# Supplementary material for: Water promoted C–C bond cleavage: facile synthesis of 3,3-bipyrrole derivatives from dienones and tosylmethyl isocyanide (TosMIC)
Source: Royal Society of Chemistry journal article supplement (doi:10.1039/c3ob42570c), 2014-01-01

Electronic Supplementary Material (ESI) for *Organic & Biomolecular Chemistry*  
This journal is © The Royal Society of Chemistry 2013

## *Supporting Information for*

Water Promoted C-C Bond Cleavage: Facile synthesis of  
3,3-bipyrrole derivatives from dienones and tosylmethyl isocyanide  
(TosMIC)

*Rong Wang, Shun-Yi Wang\* and Shun-Jun Ji\**

Key Laboratory of Organic Synthesis of Jiangsu Province, College of Chemistry, Chemical  
Engineering and Materials Science, Soochow University, Suzhou 215123, China.

*E-mail: shunyi@suda.edu.cn; chemjsj@suda.edu.cn*

|                                                                |        |
|----------------------------------------------------------------|--------|
| Table of Contents -----                                        | S2     |
| Copies of <sup>1</sup> H and <sup>13</sup> C NMR Spectra ----- | S3-S23 |

Electronic Supplementary Material (ESI) for *Organic & Biomolecular Chemistry*  
This journal is © The Royal Society of Chemistry 2013

**Table 1.** Screening of reaction conditions<sup>a</sup>

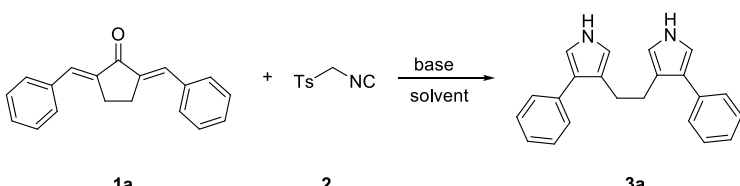

**1a**                      **2**                      **3a**

| entr | Base | Solvent                          | Temp ( °C) | Yield( |
|------|------|----------------------------------|------------|--------|
| 13   | KOH  | CH <sub>3</sub> CN               | 25         | 21     |
| 14   | KOH  | CH <sub>2</sub> Cl <sub>2</sub>  | 25         | 19     |
| 15   | KOH  | Tol.                             | 25         | 15     |
| 16   | KOH  | DMF                              | 0          | 10     |
| 17   | KOH  | DMF                              | 50         | 45     |
| 18   | KOH  | dry DMF + 20 μl H <sub>2</sub> O | 100        | 78     |

<sup>a</sup>The reactions were performed with **1a** (0.5 mmol, 1.0 eq.) and TosMIC **2** (1.2 mmol, 2.4 eq.) in the presence of base.

<sup>b</sup>Isolated yield.

Electronic Supplementary Material (ESI) for *Organic & Biomolecular Chemistry*  
This journal is © The Royal Society of Chemistry 2013

**1,2-bis(4-phenyl-1H-pyrrol-3-yl)ethane (3a).**

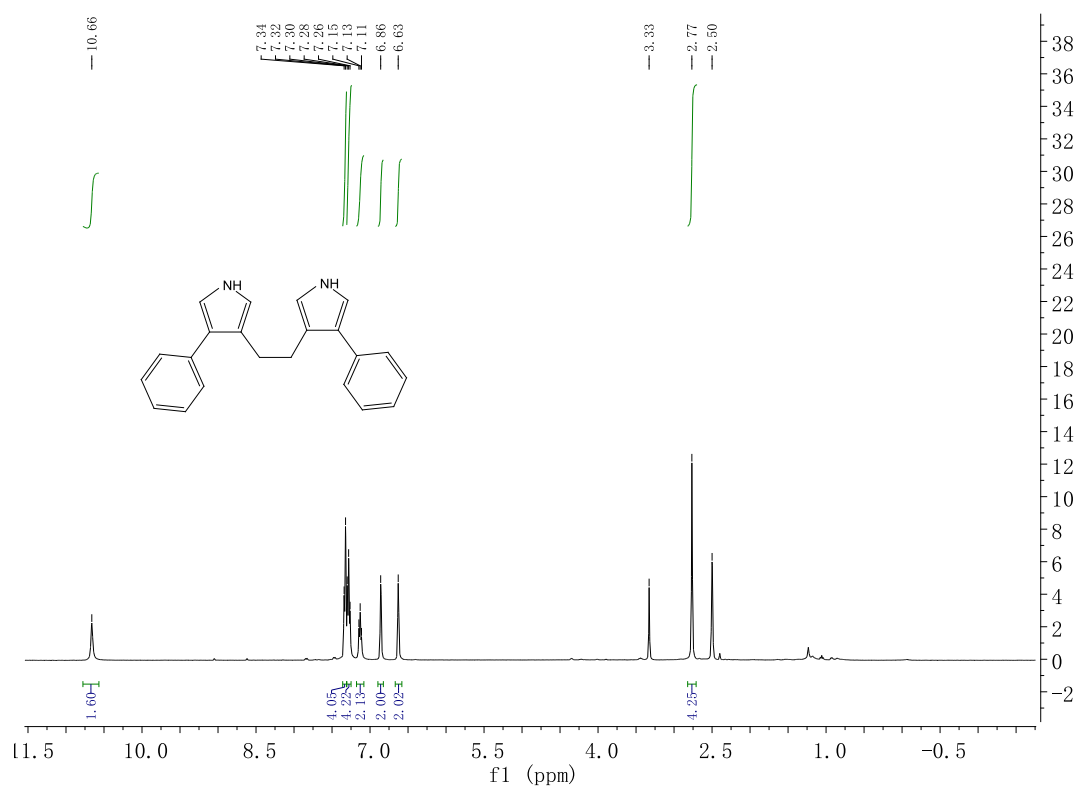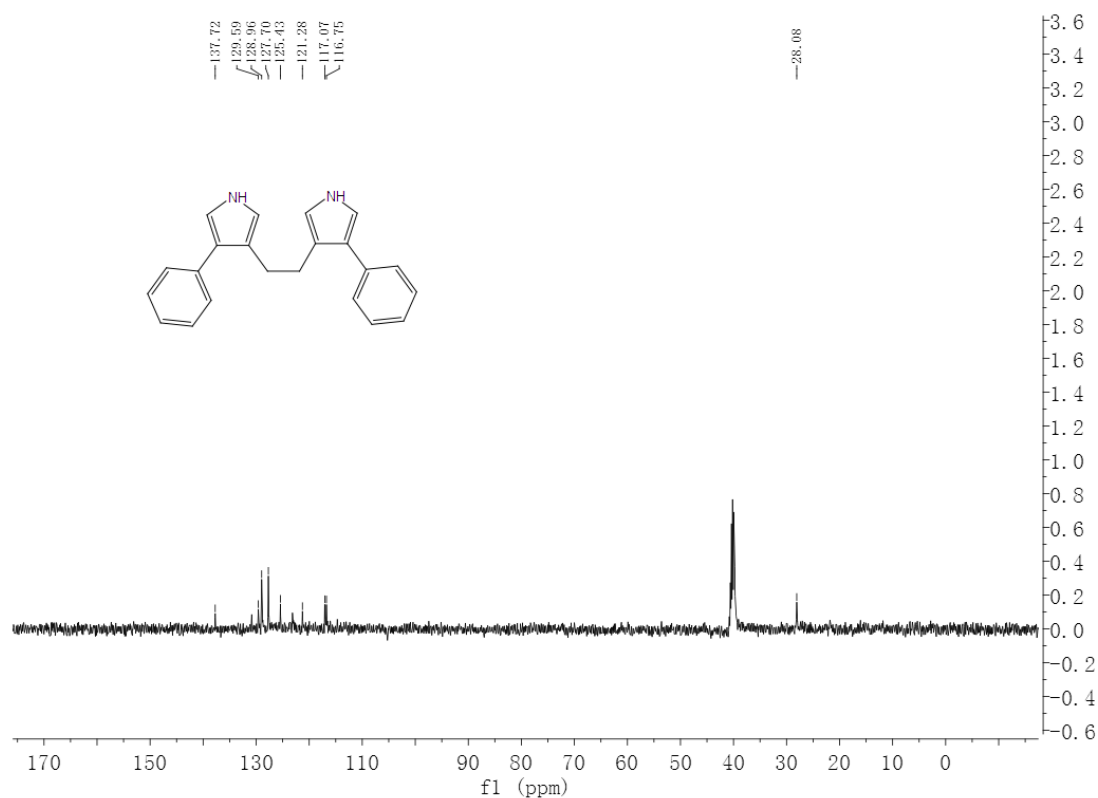

Electronic Supplementary Material (ESI) for *Organic & Biomolecular Chemistry*  
This journal is © The Royal Society of Chemistry 2013

**1,2-bis(4-o-tolyl-1H-pyrrol-3-yl)ethane (3b).**

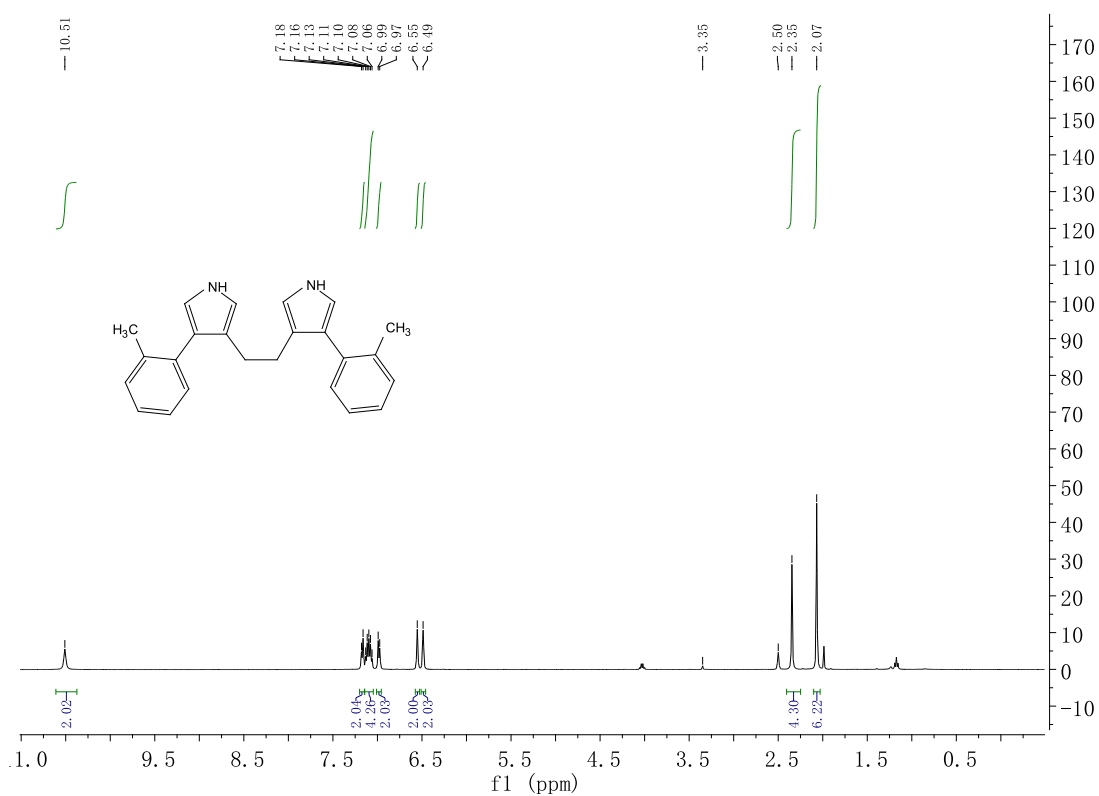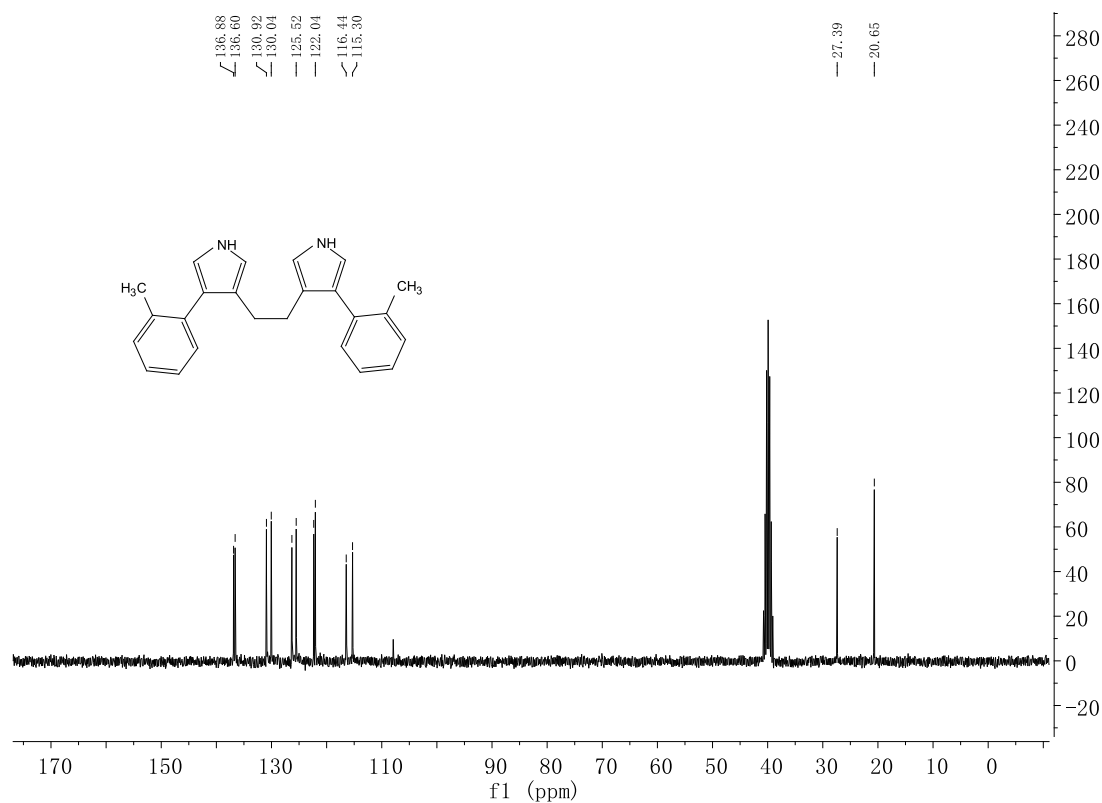

Electronic Supplementary Material (ESI) for *Organic & Biomolecular Chemistry*  
This journal is © The Royal Society of Chemistry 2013

**1,2-bis(4-m-tolyl-1H-pyrrol-3-yl)ethane (3c).**

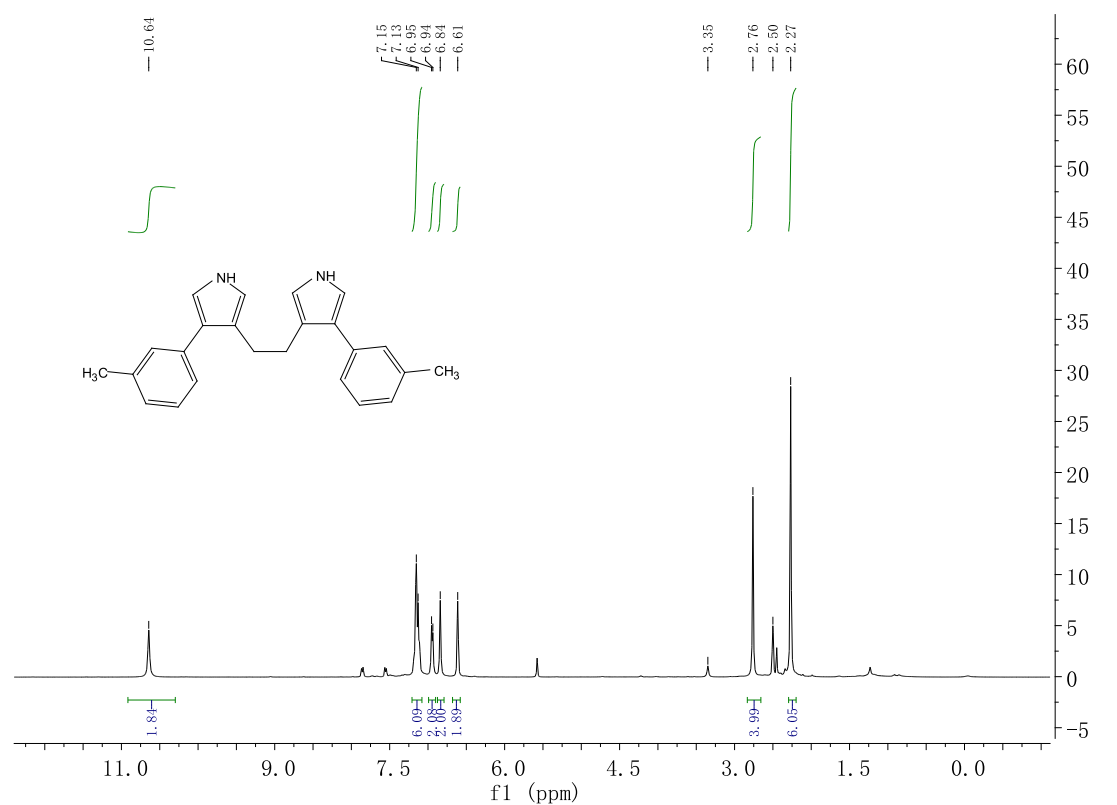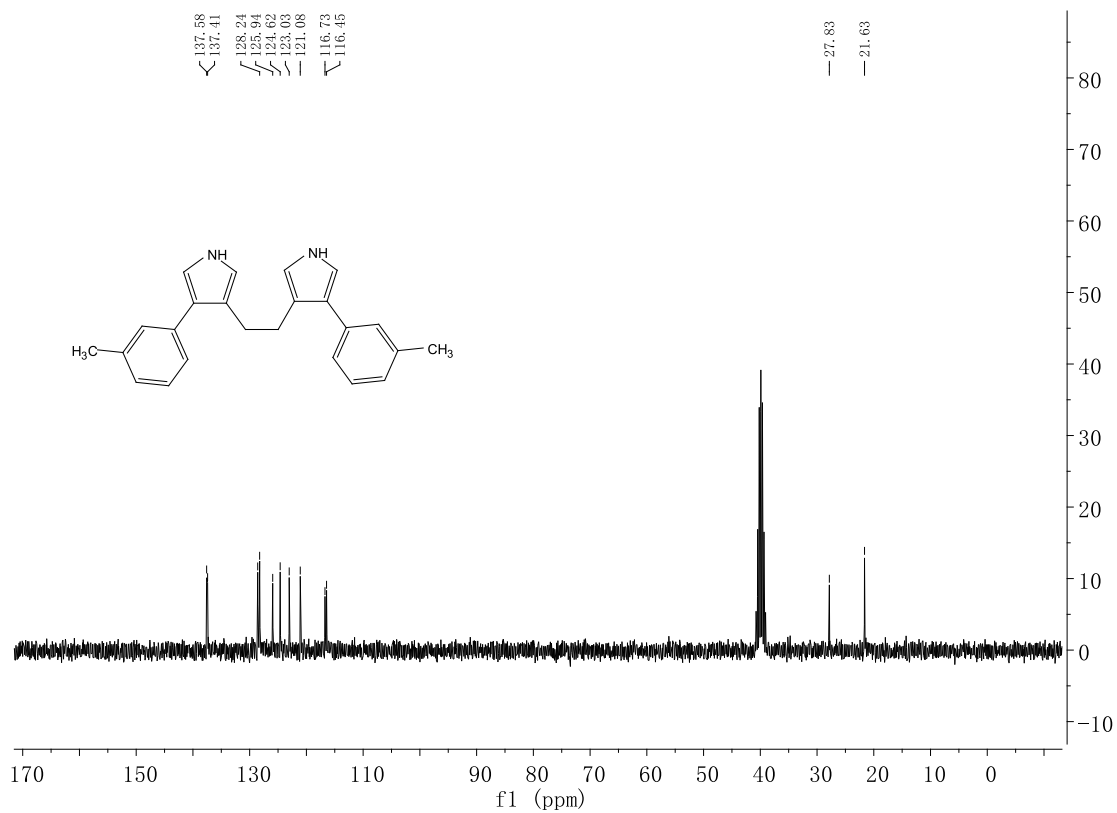

Electronic Supplementary Material (ESI) for *Organic & Biomolecular Chemistry*  
This journal is © The Royal Society of Chemistry 2013

**1,2-bis(4-p-tolyl-1H-pyrrol-3-yl)ethane (3d).**

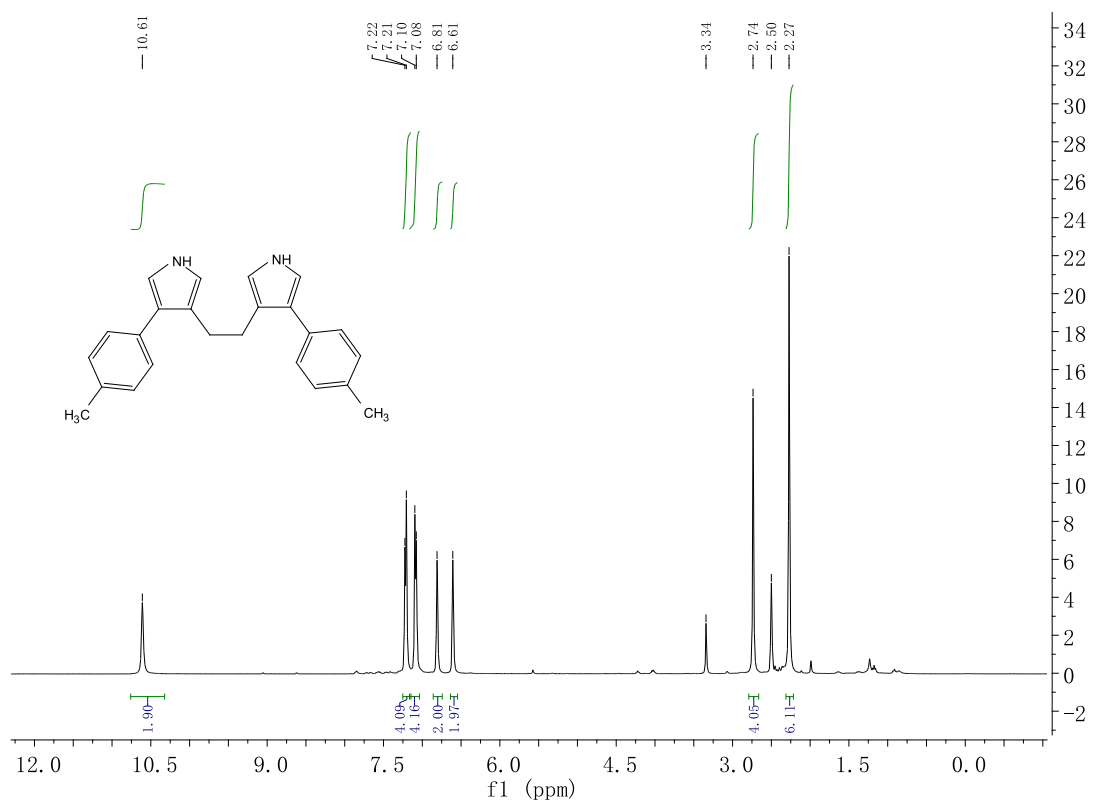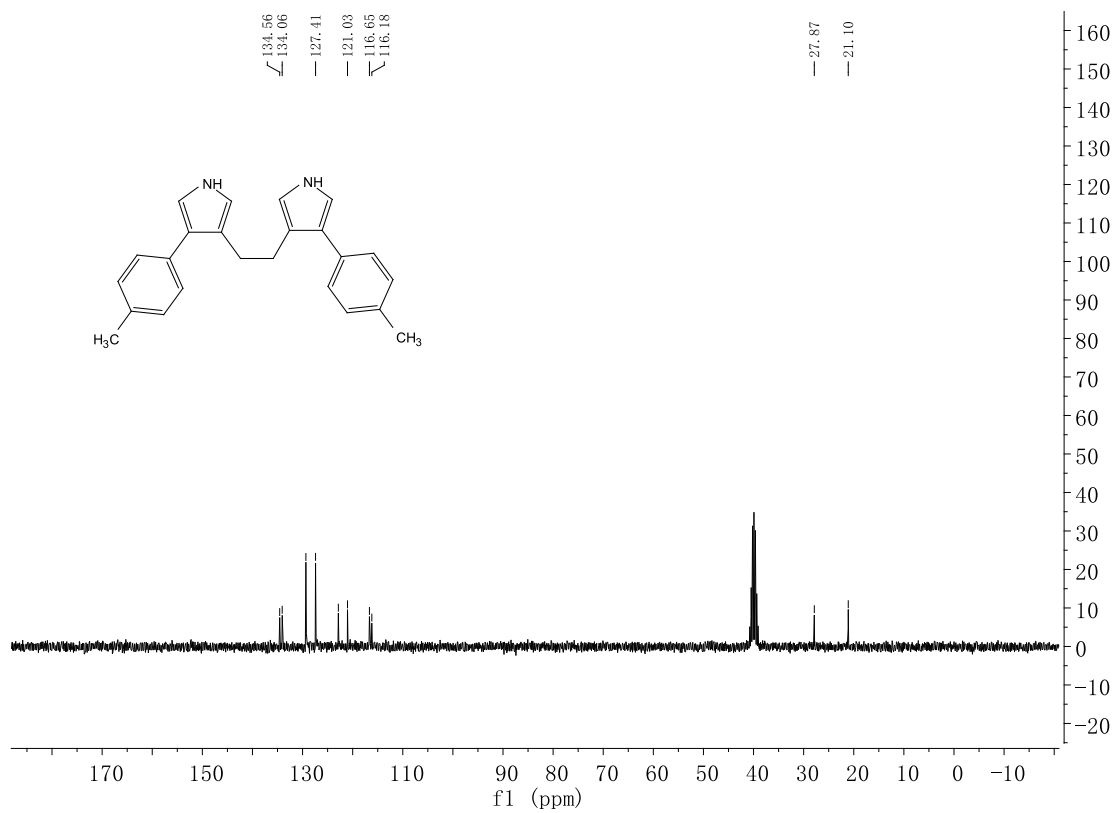

Electronic Supplementary Material (ESI) for *Organic & Biomolecular Chemistry*  
This journal is © The Royal Society of Chemistry 2013

**1,2-bis(4-(2-methoxyphenyl)-1H-pyrrol-3-yl)ethane (3e).**

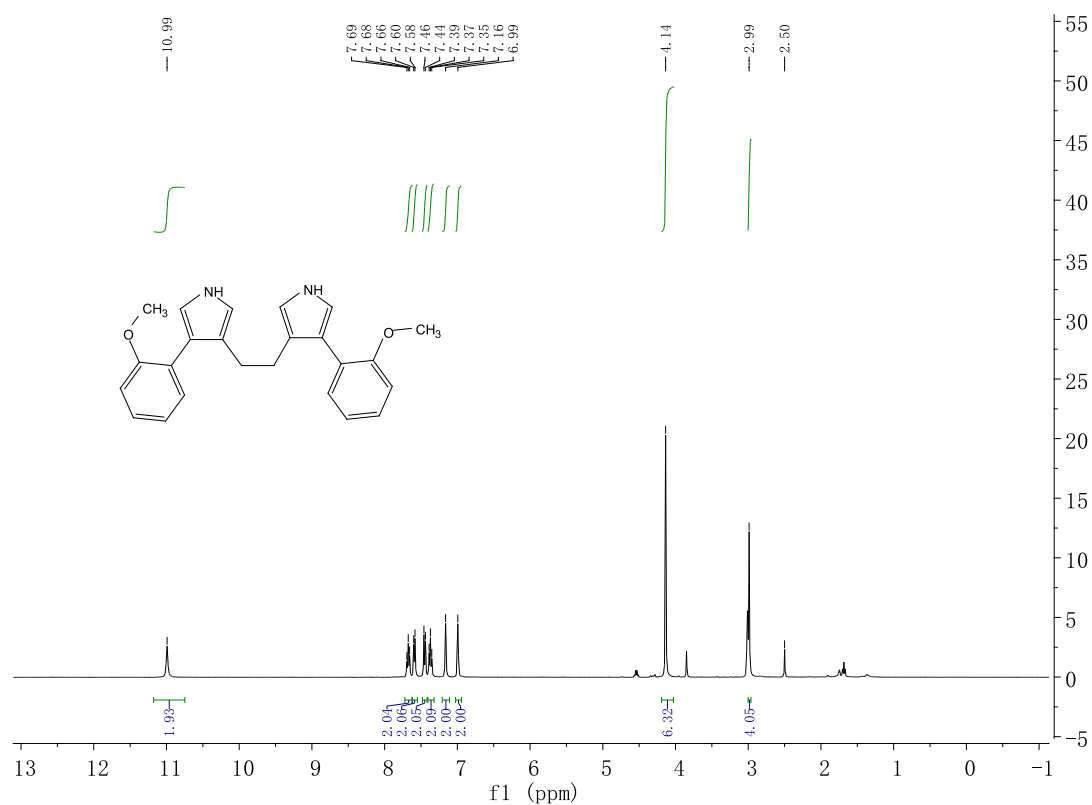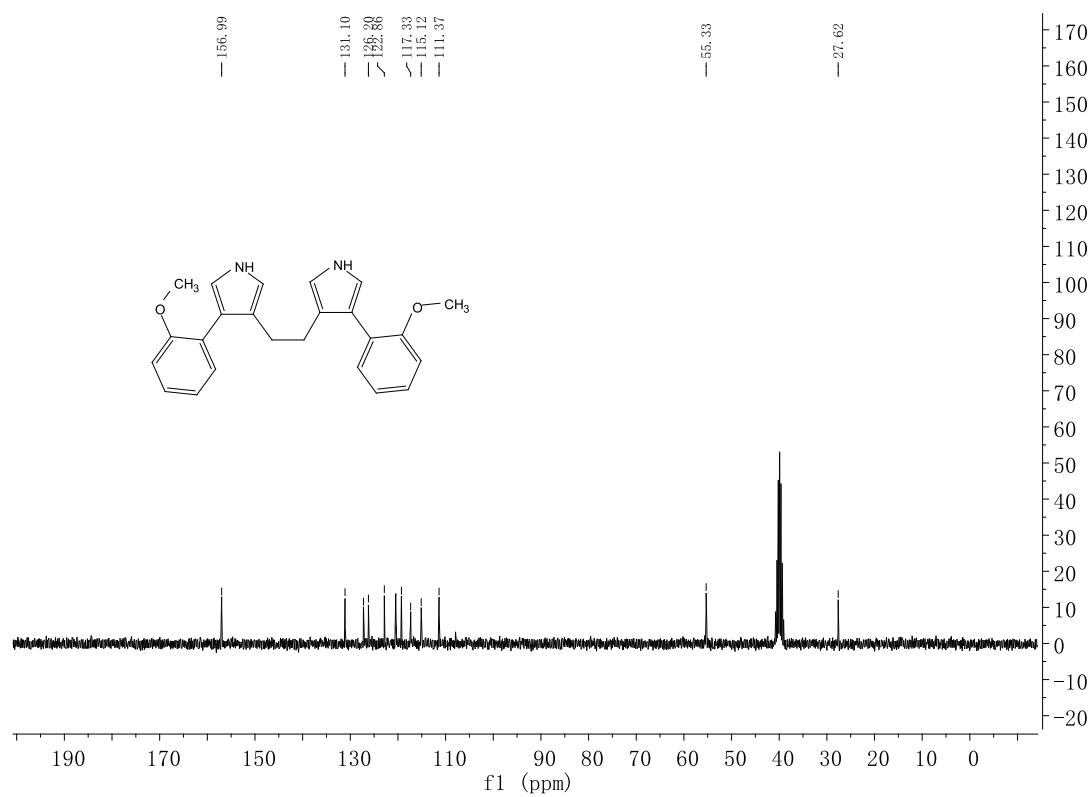

Electronic Supplementary Material (ESI) for *Organic & Biomolecular Chemistry*  
This journal is © The Royal Society of Chemistry 2013

**1,2-bis(4-(3-methoxyphenyl)-1H-pyrrol-3-yl)ethane (3f).**

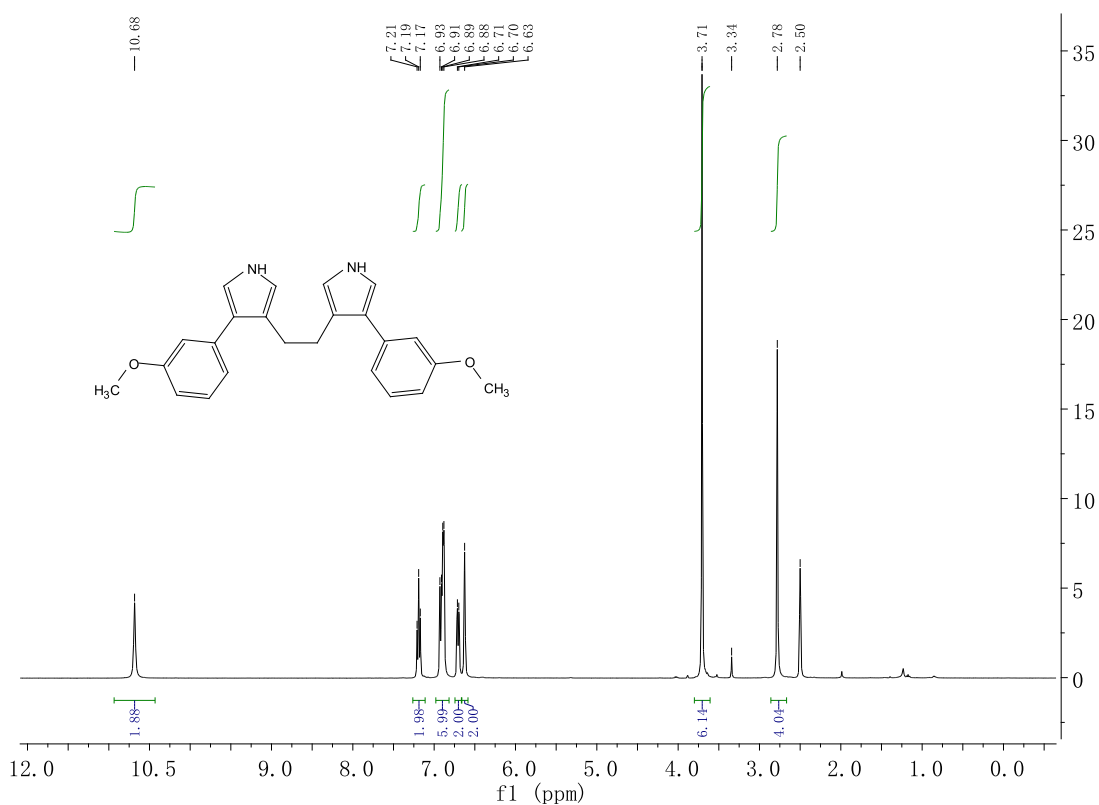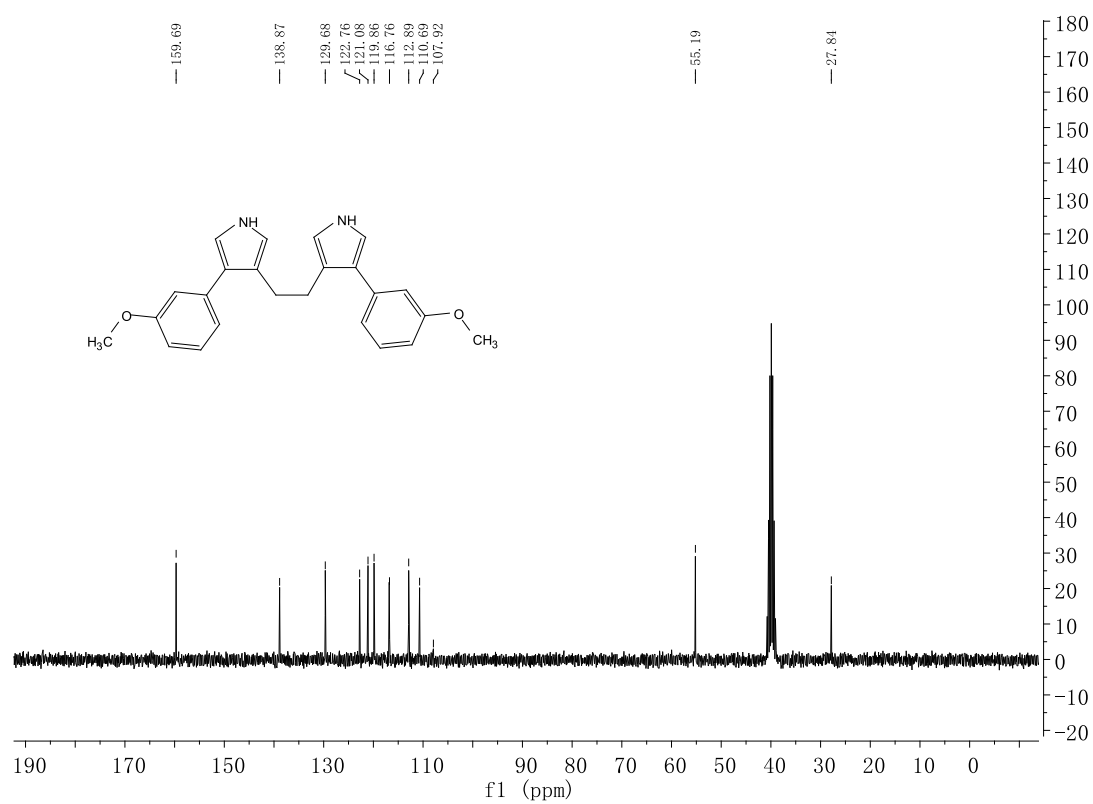



Electronic Supplementary Material (ESI) for *Organic & Biomolecular Chemistry*  
This journal is © The Royal Society of Chemistry 2013

**1,2-bis(4-(4-fluorophenyl)-1H-pyrrol-3-yl)ethane (3g).**

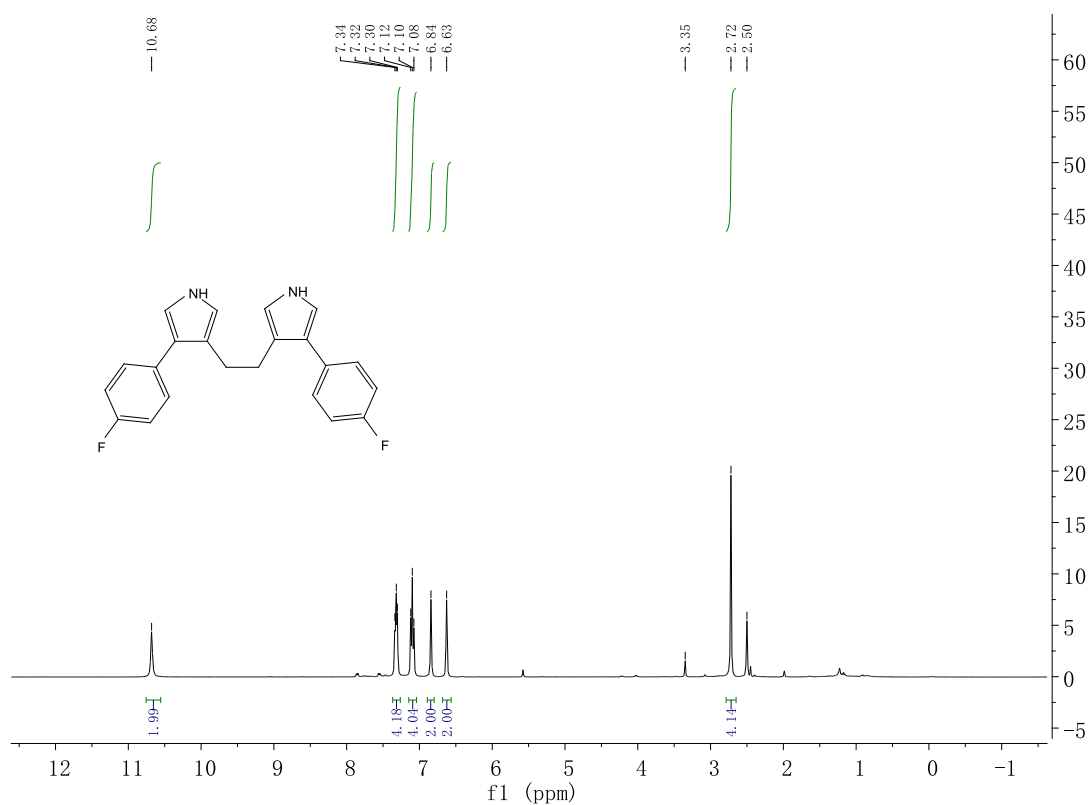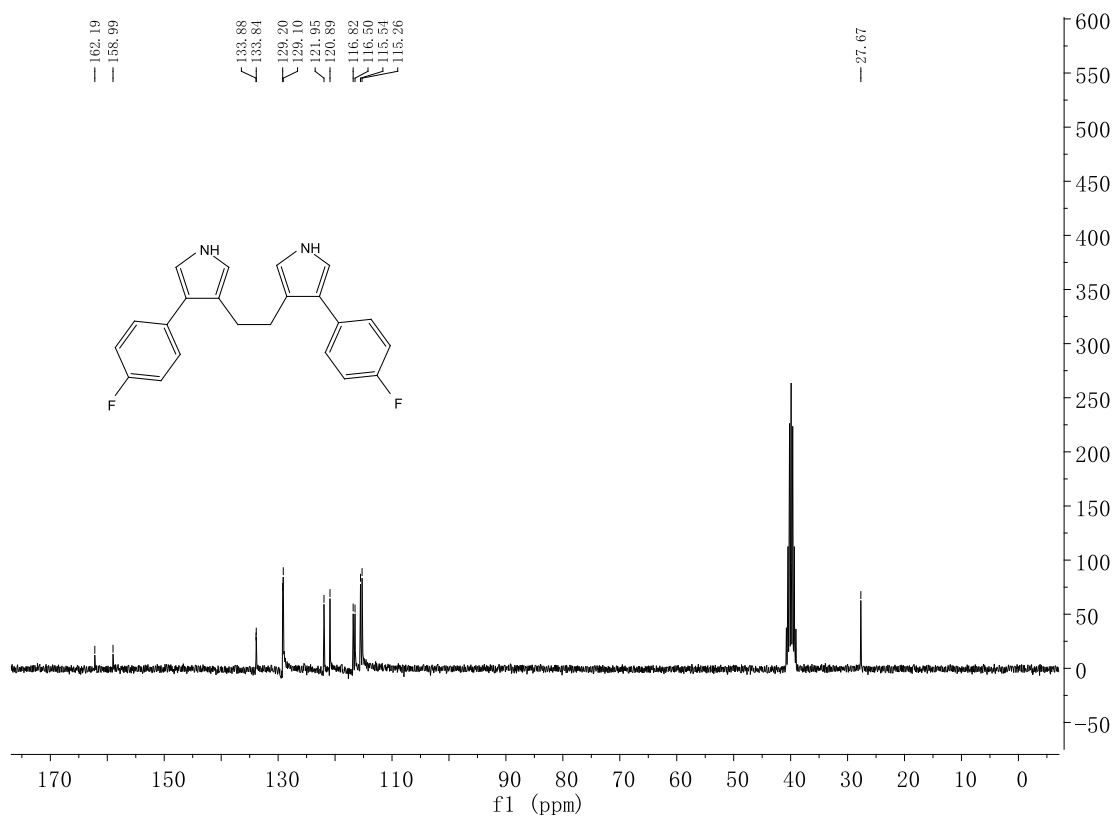

Electronic Supplementary Material (ESI) for *Organic & Biomolecular Chemistry*  
This journal is © The Royal Society of Chemistry 2013

**1,2-bis(4-(3-chlorophenyl)-1H-pyrrol-3-yl)ethane (3h).**

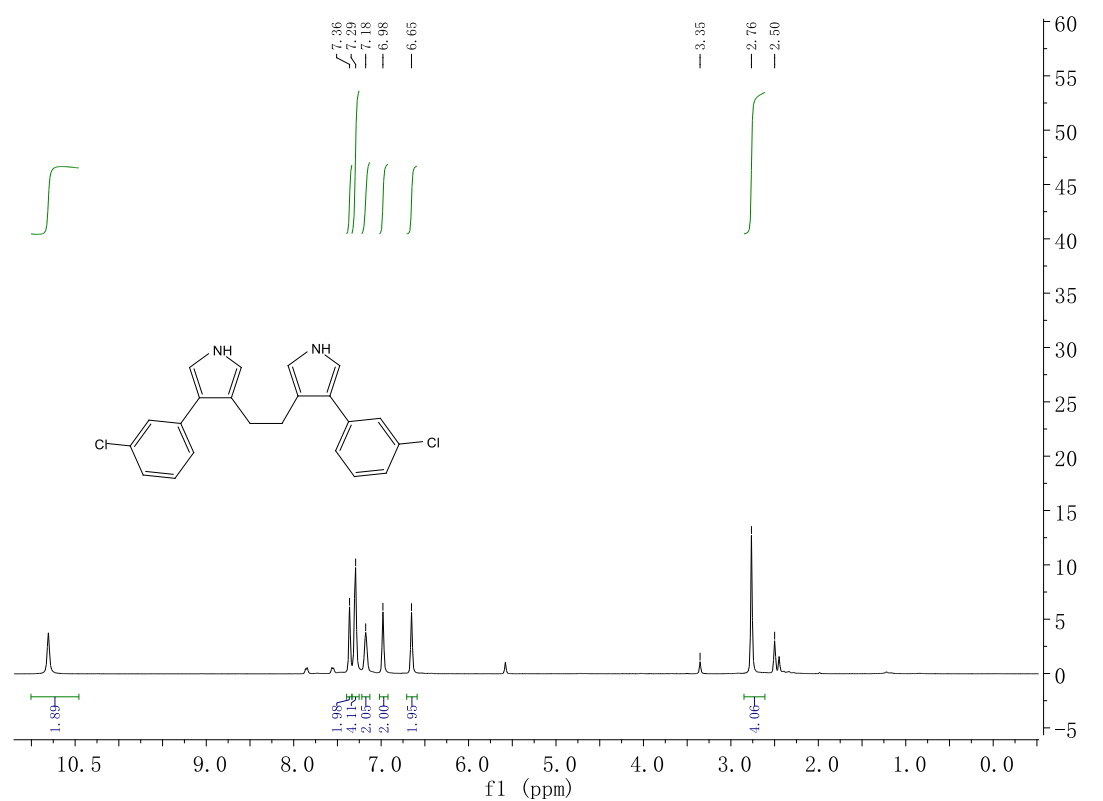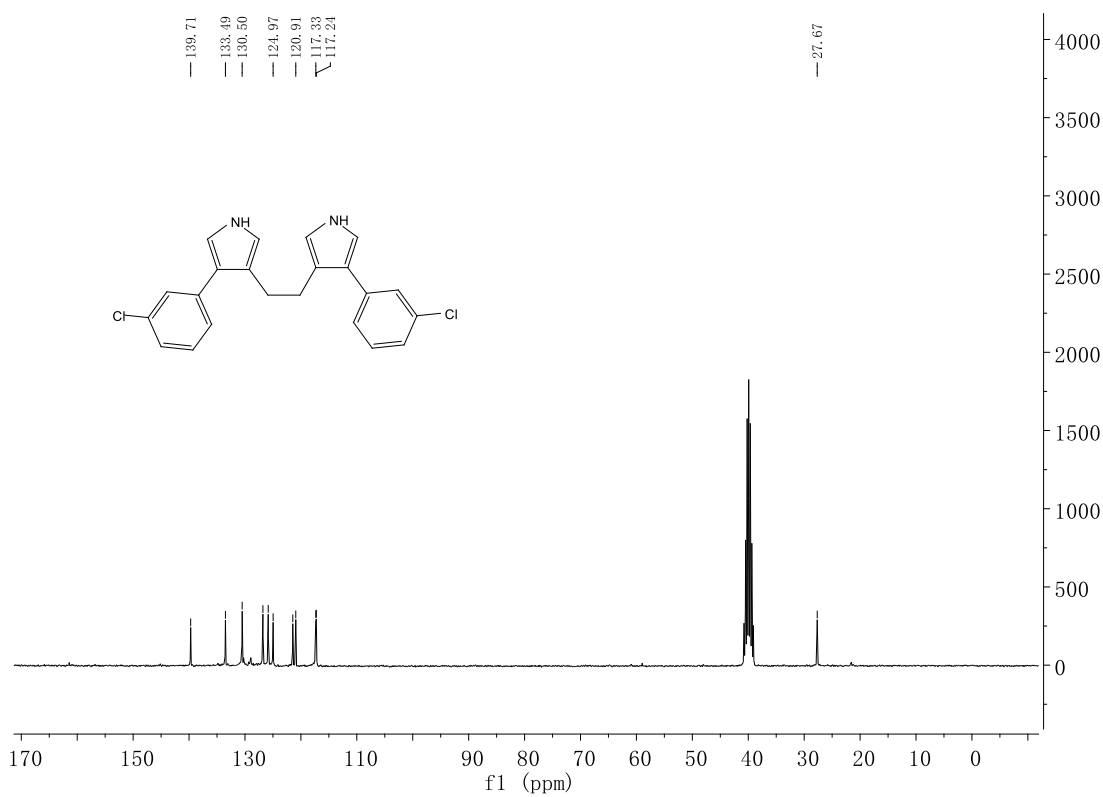

Electronic Supplementary Material (ESI) for *Organic & Biomolecular Chemistry*  
This journal is © The Royal Society of Chemistry 2013

**1,2-bis(4-(4-chlorophenyl)-1H-pyrrol-3-yl)ethane (3i).**

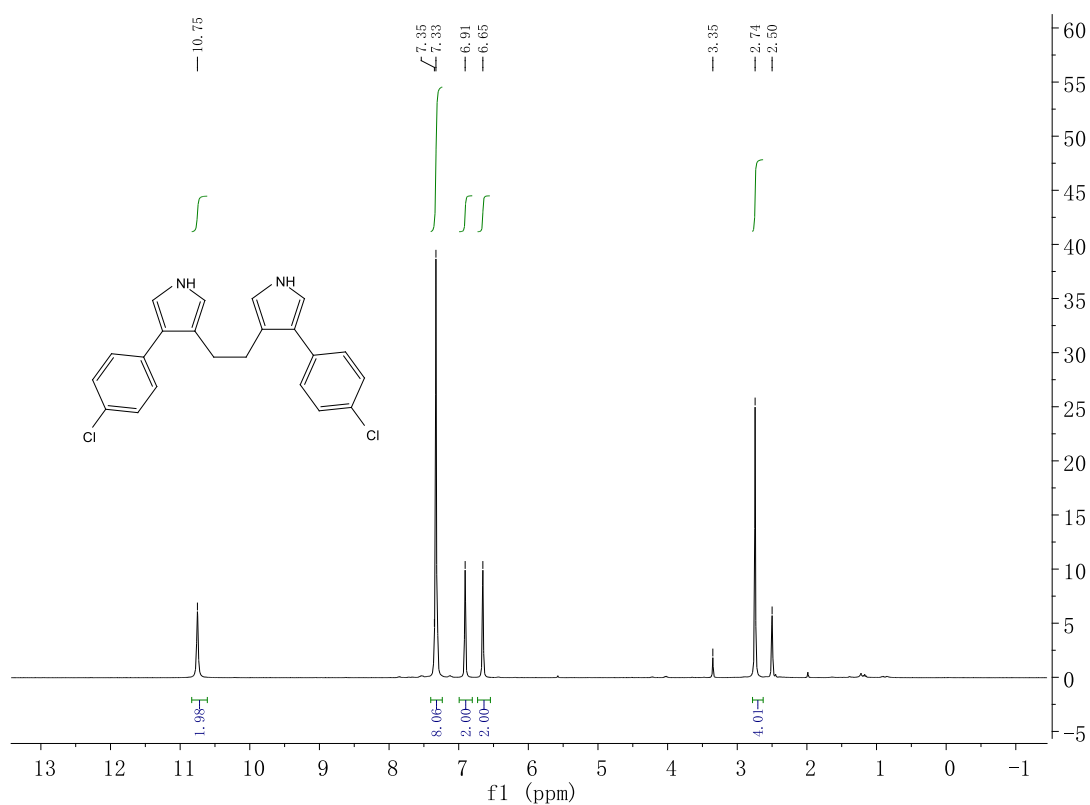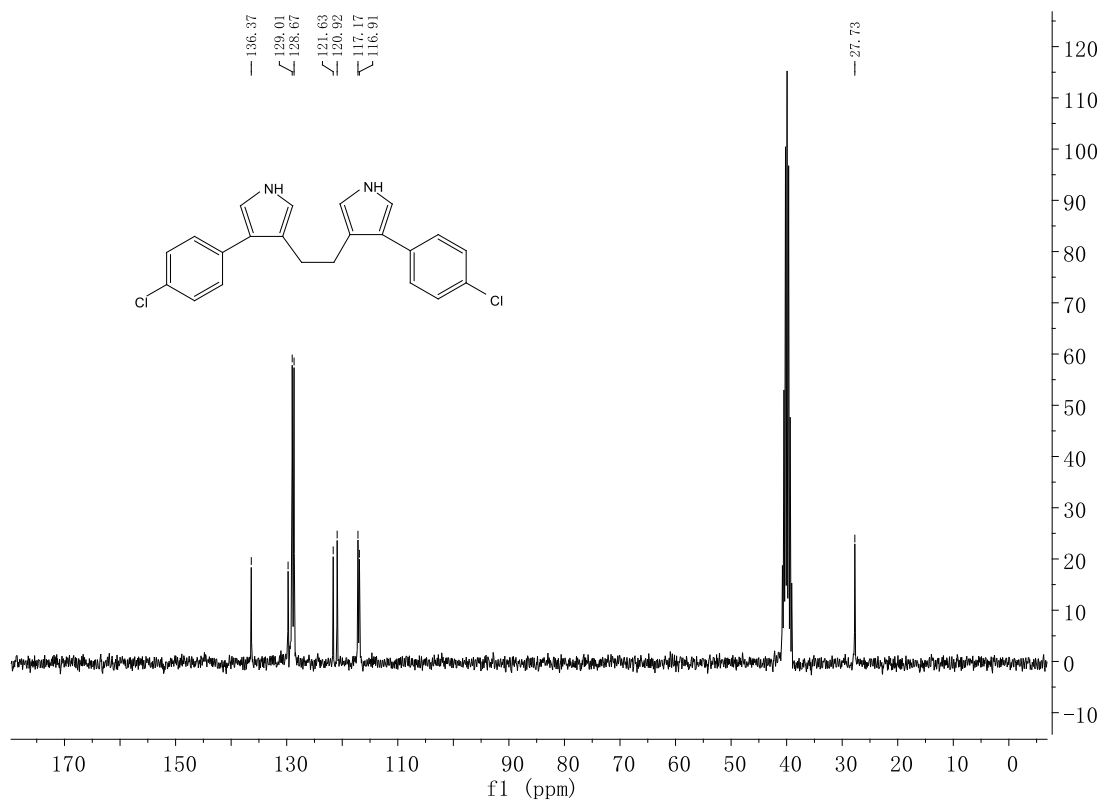

Electronic Supplementary Material (ESI) for *Organic & Biomolecular Chemistry*  
This journal is © The Royal Society of Chemistry 2013

**1,2-bis(4-(4-bromophenyl)-1H-pyrrol-3-yl)ethane (3j).**

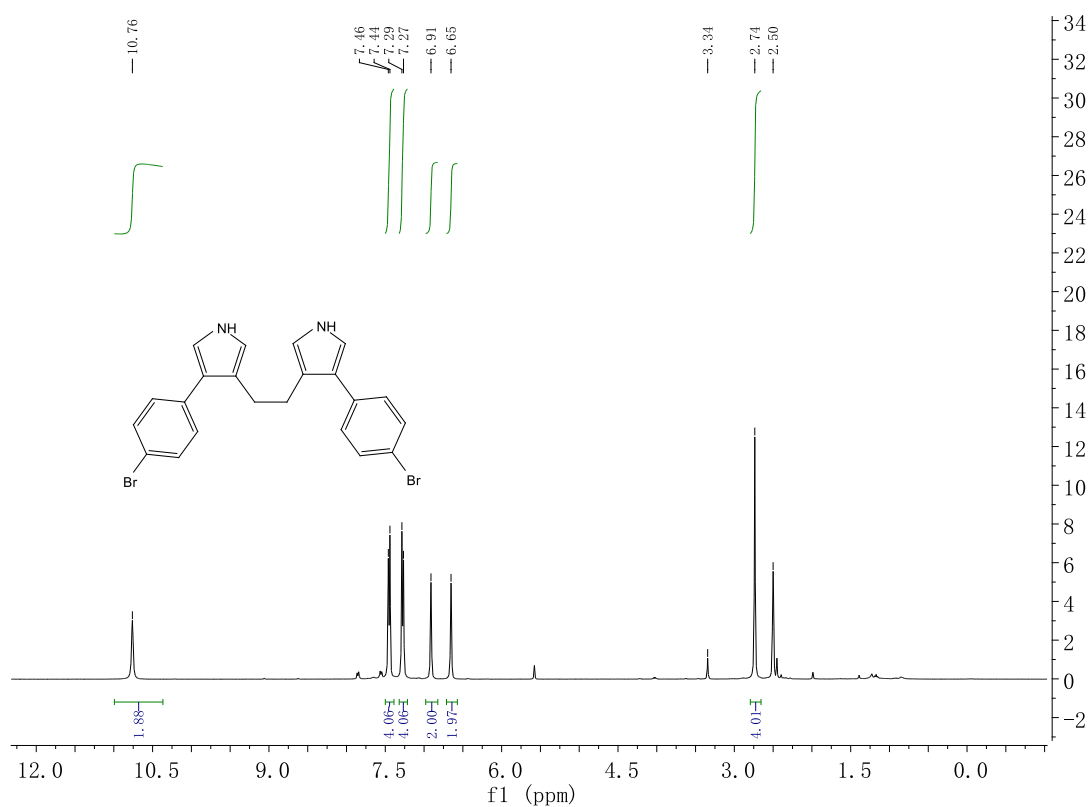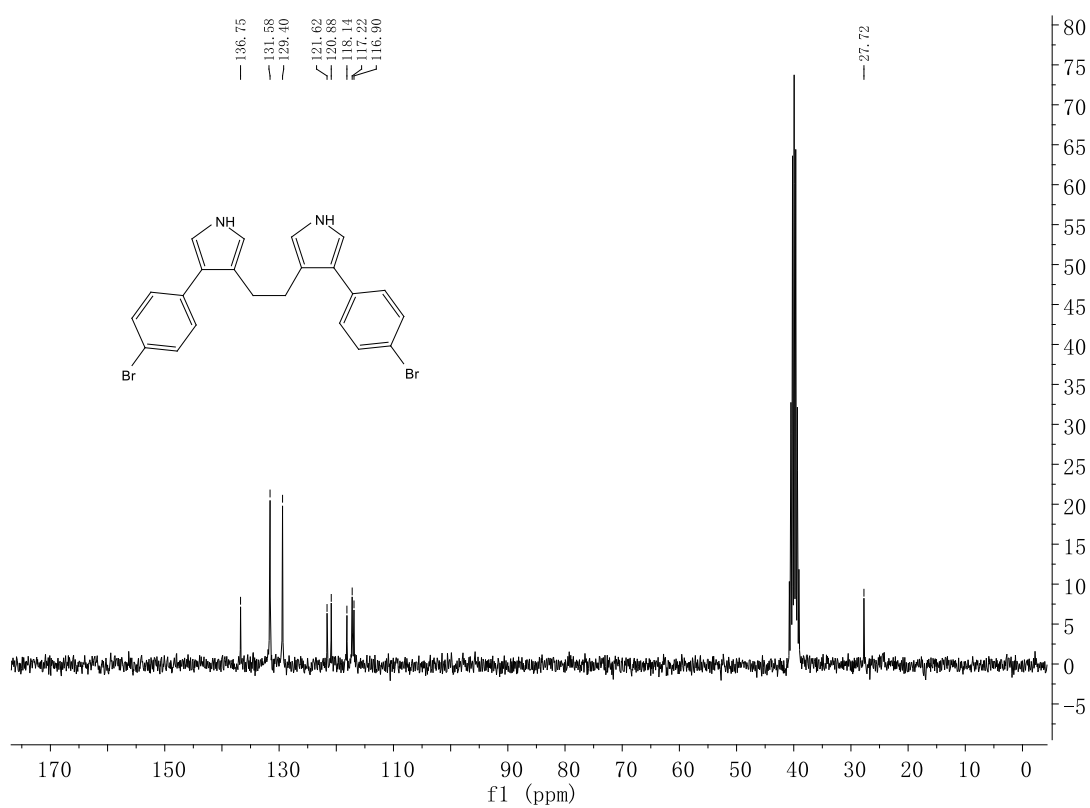

Electronic Supplementary Material (ESI) for *Organic & Biomolecular Chemistry*  
This journal is © The Royal Society of Chemistry 2013

**1,2-bis(4-(3-nitrophenyl)-1H-pyrrol-3-yl)ethane (3k).**

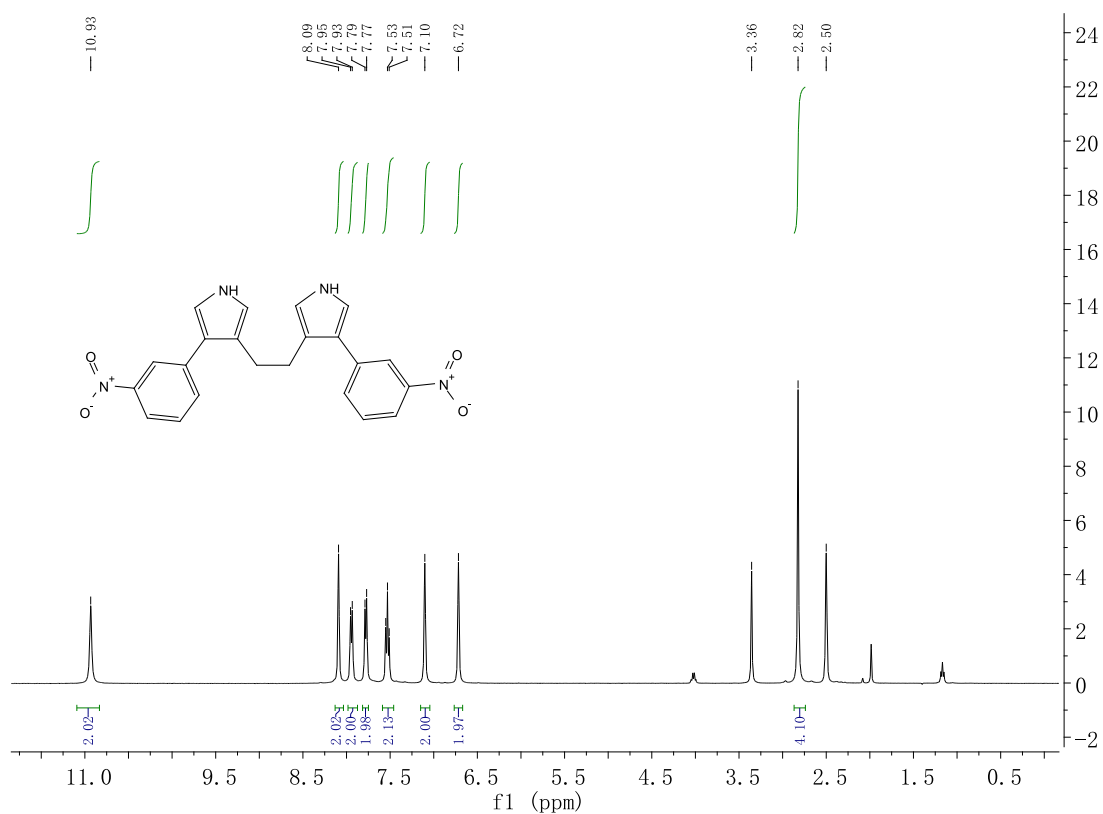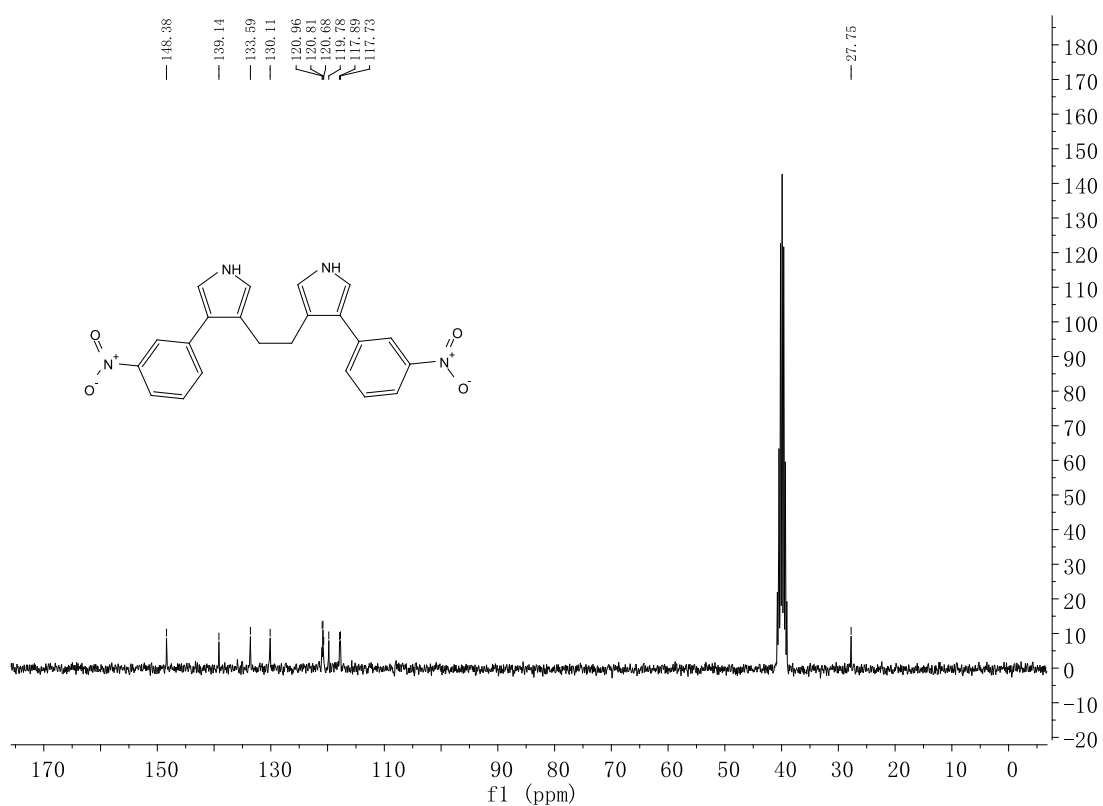

Electronic Supplementary Material (ESI) for *Organic & Biomolecular Chemistry*  
This journal is © The Royal Society of Chemistry 2013

**1,2-bis(4-(4-nitrophenyl)-1H-pyrrol-3-yl)ethane (3l).**

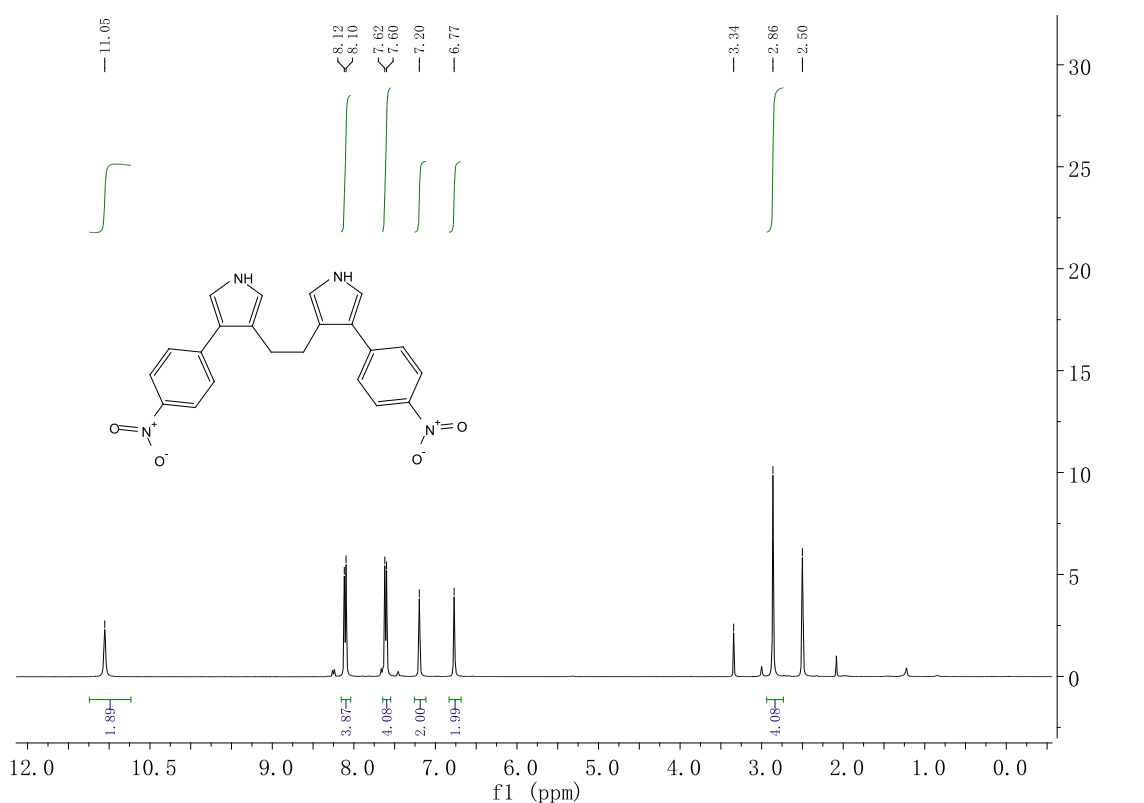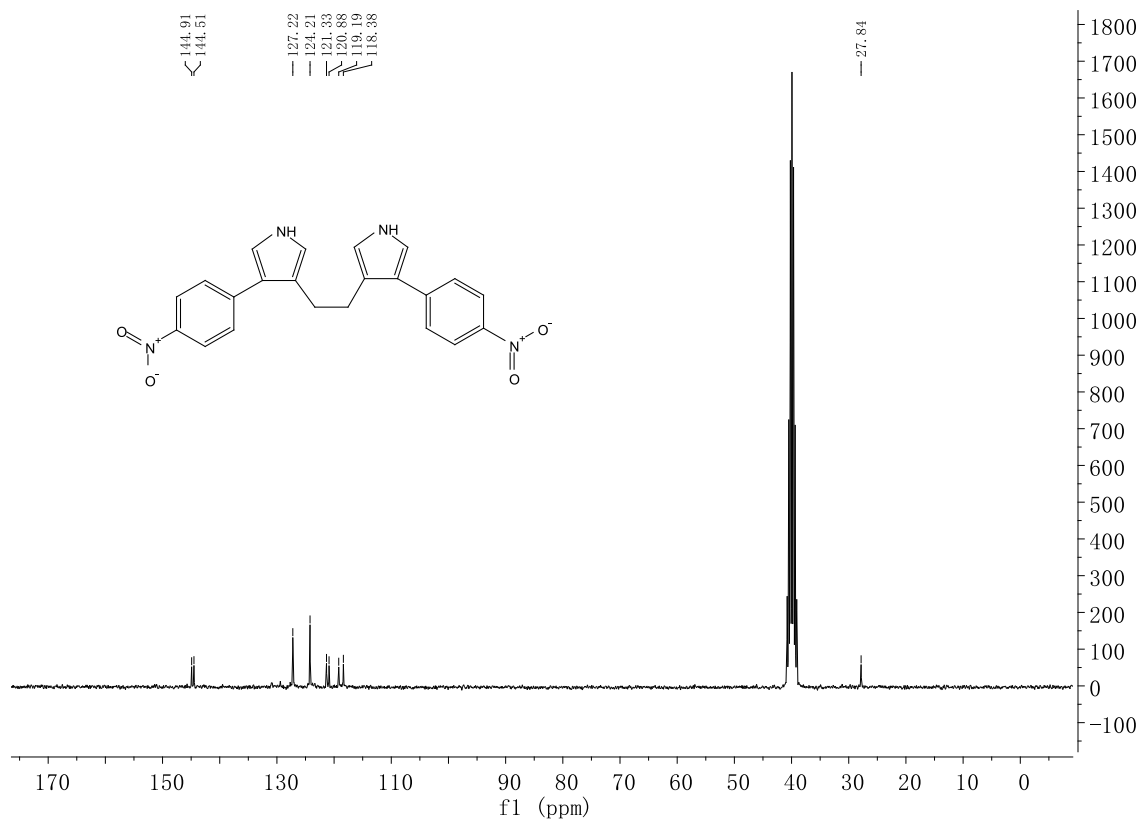

Electronic Supplementary Material (ESI) for *Organic & Biomolecular Chemistry*  
This journal is © The Royal Society of Chemistry 2013

**1,2-bis(4-(pyridin-2-yl)-1H-pyrrol-3-yl)ethane (3m).**

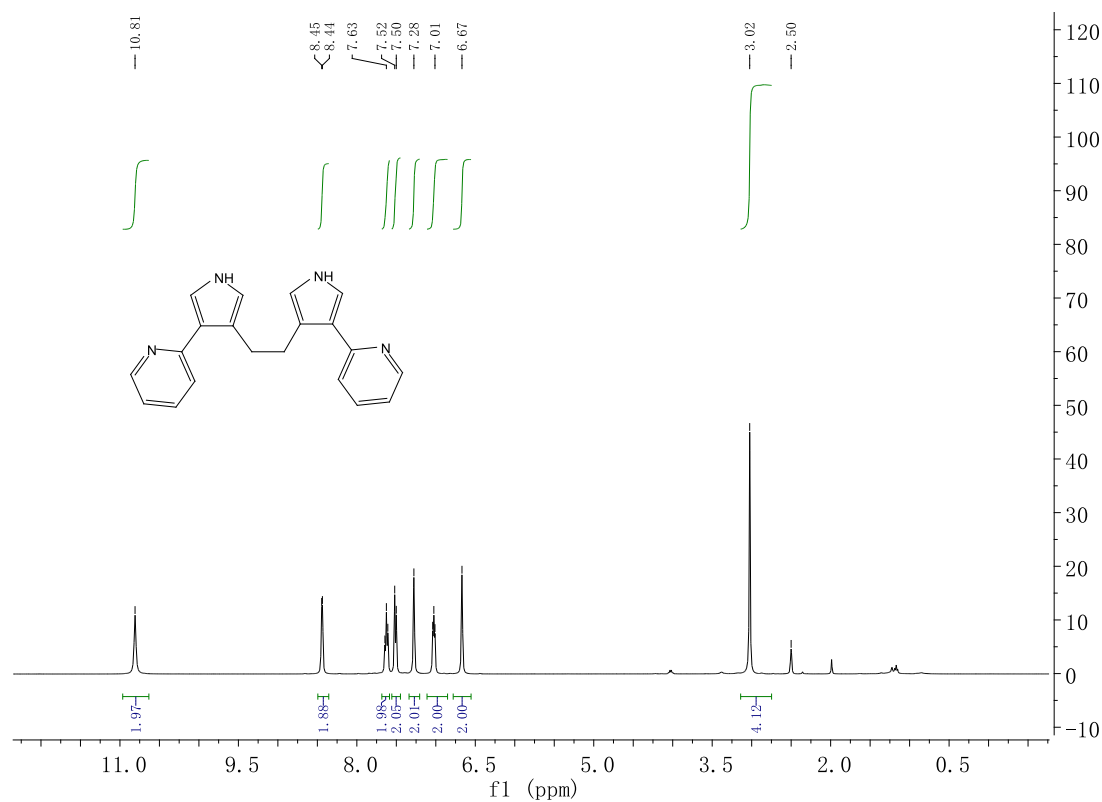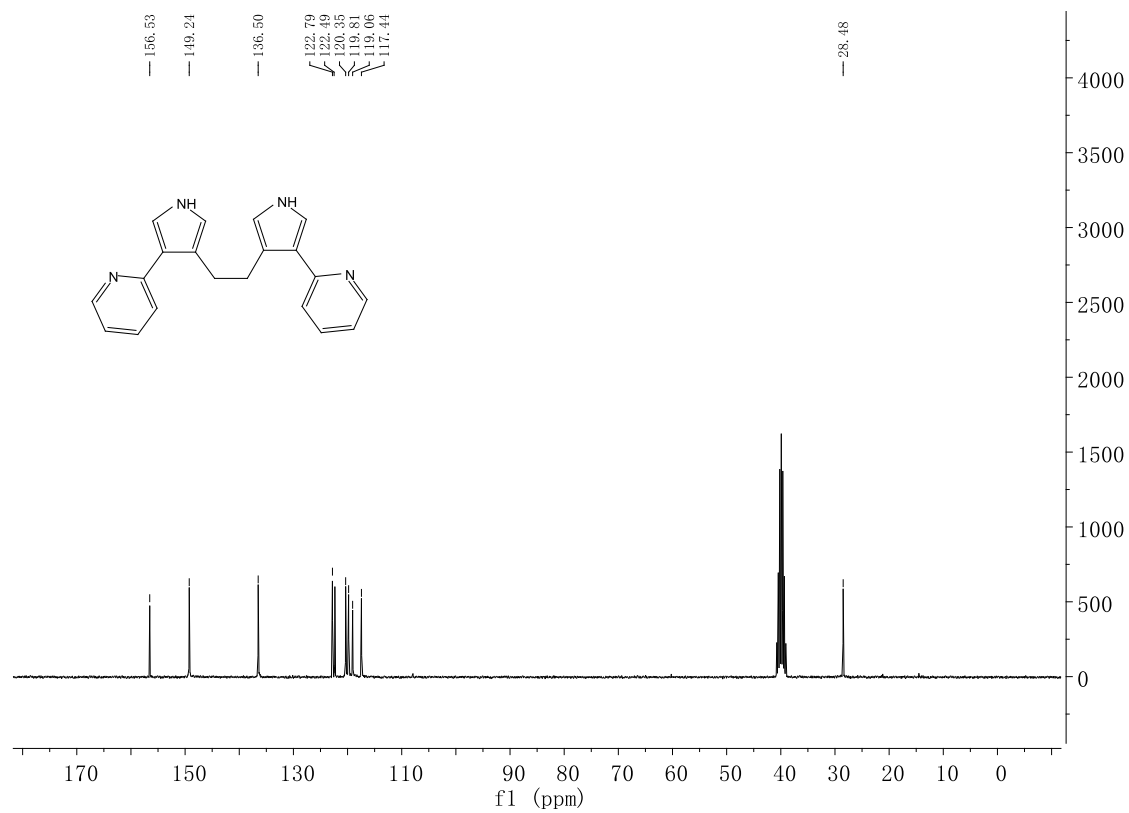

Electronic Supplementary Material (ESI) for *Organic & Biomolecular Chemistry*  
This journal is © The Royal Society of Chemistry 2013

**1,2-bis(4-(pyridin-3-yl)-1H-pyrrol-3-yl)ethane (3n).**

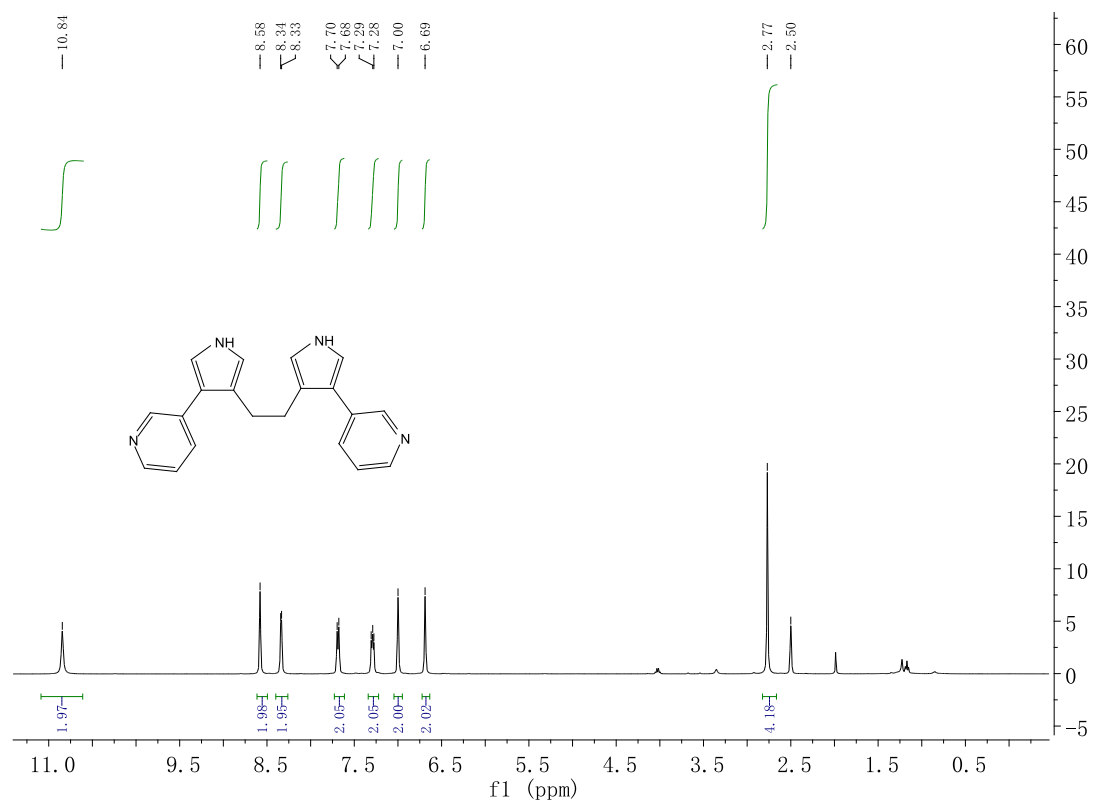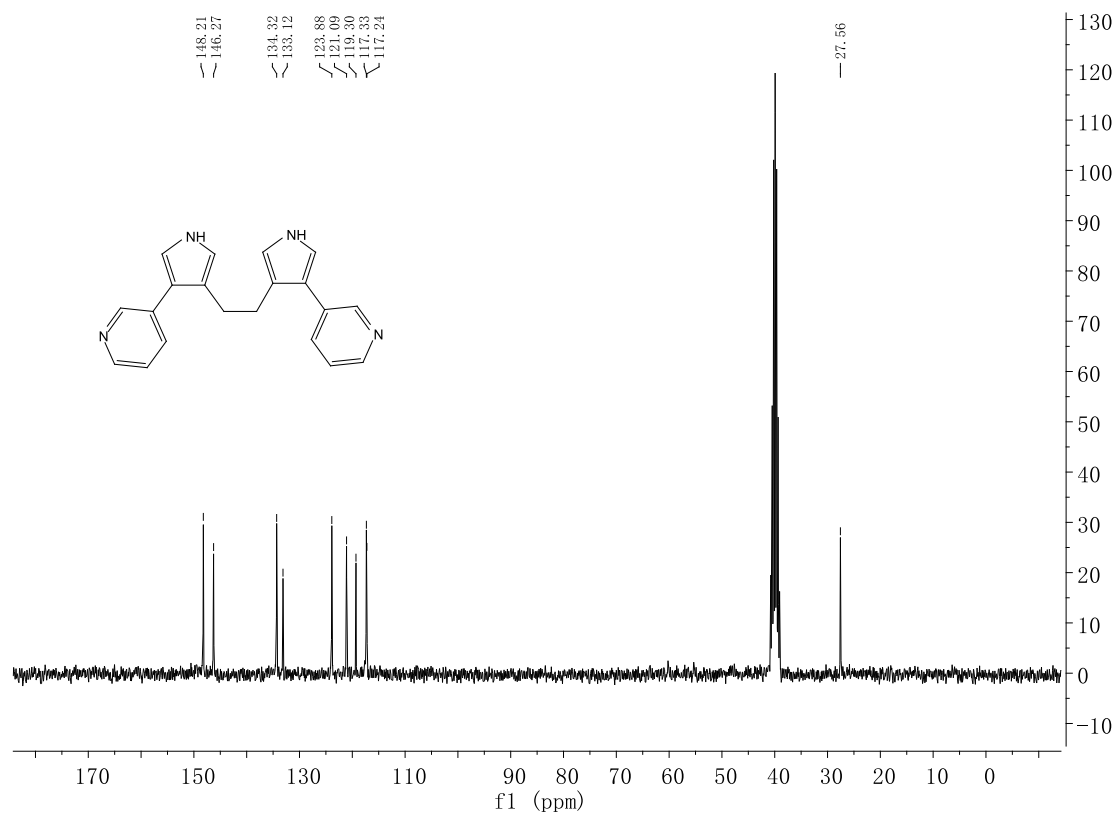



Electronic Supplementary Material (ESI) for *Organic & Biomolecular Chemistry*  
This journal is © The Royal Society of Chemistry 2013

**1,2-bis(4-(furan-2-yl)-1H-pyrrol-3-yl)ethane (3o).**

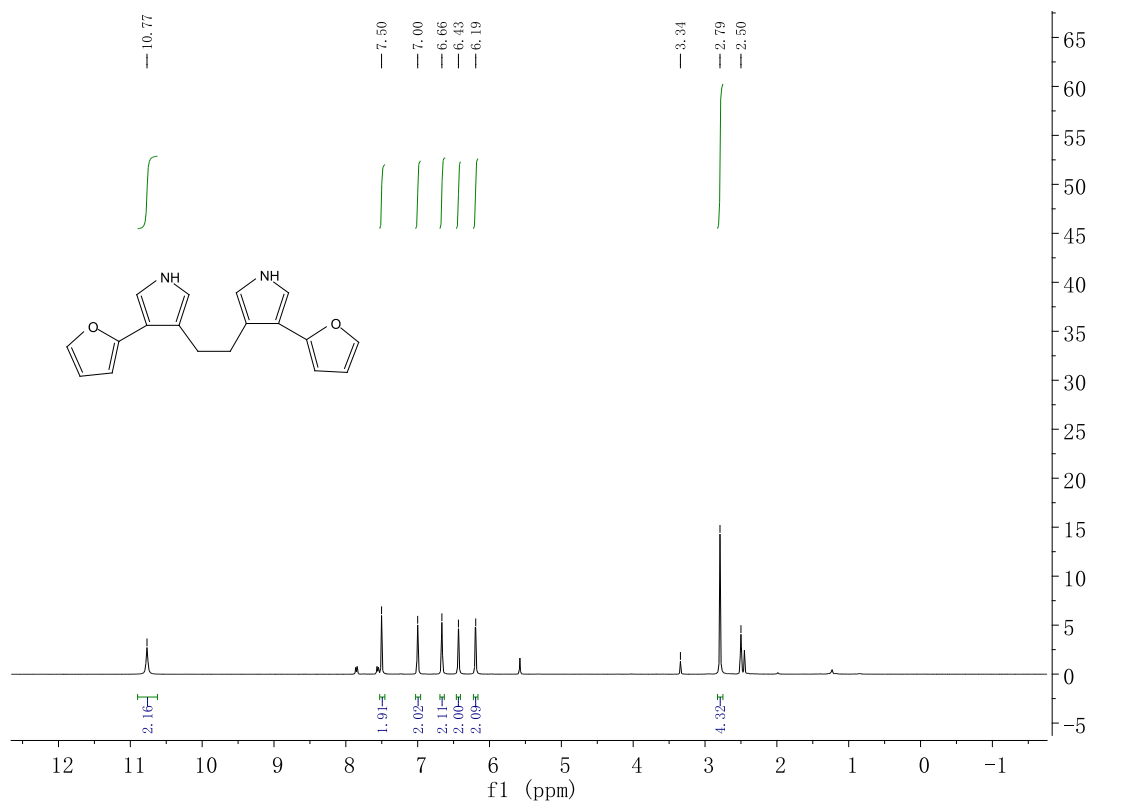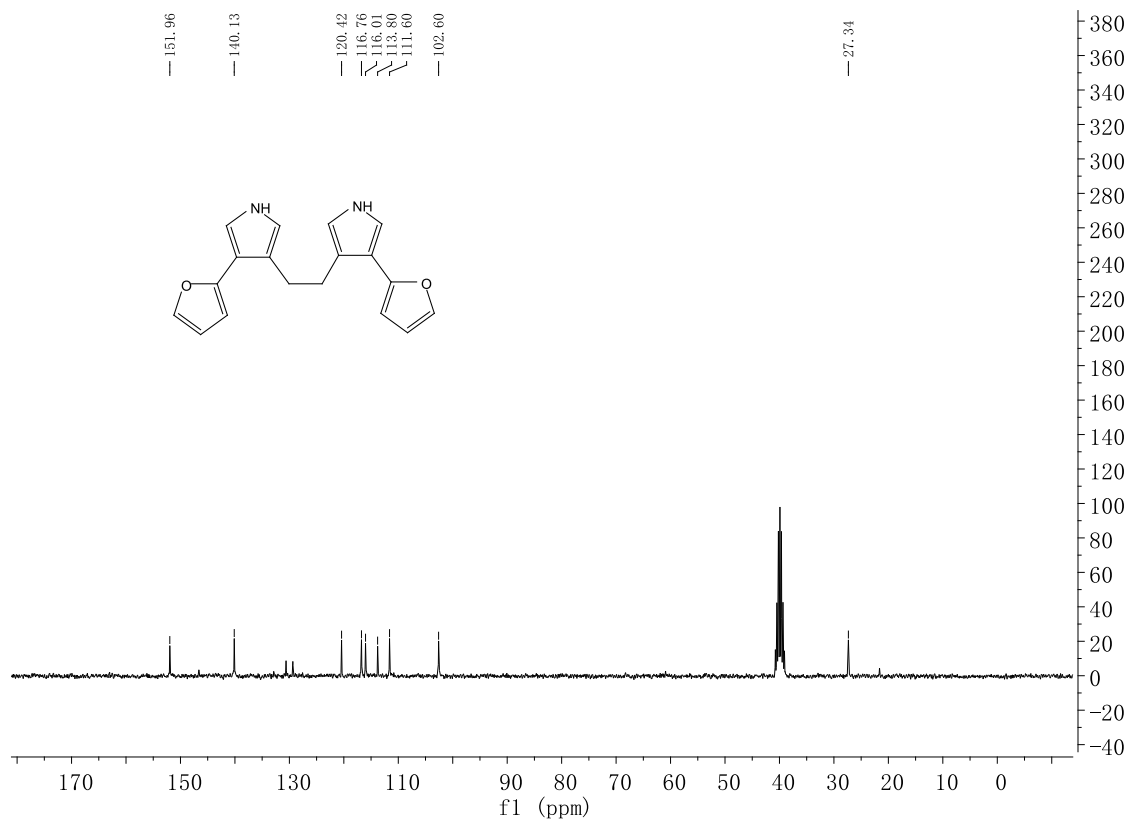

Electronic Supplementary Material (ESI) for *Organic & Biomolecular Chemistry*  
This journal is © The Royal Society of Chemistry 2013

**1,3-bis(4-phenyl-1H-pyrrol-3-yl)propane (3p).**

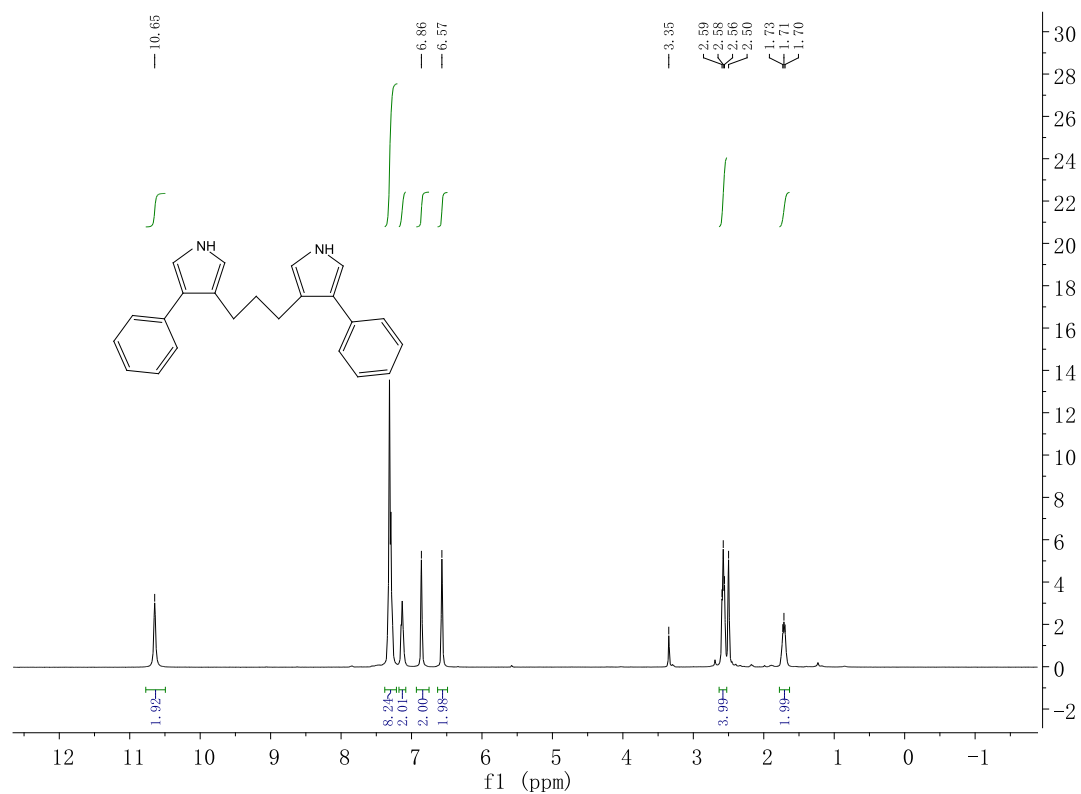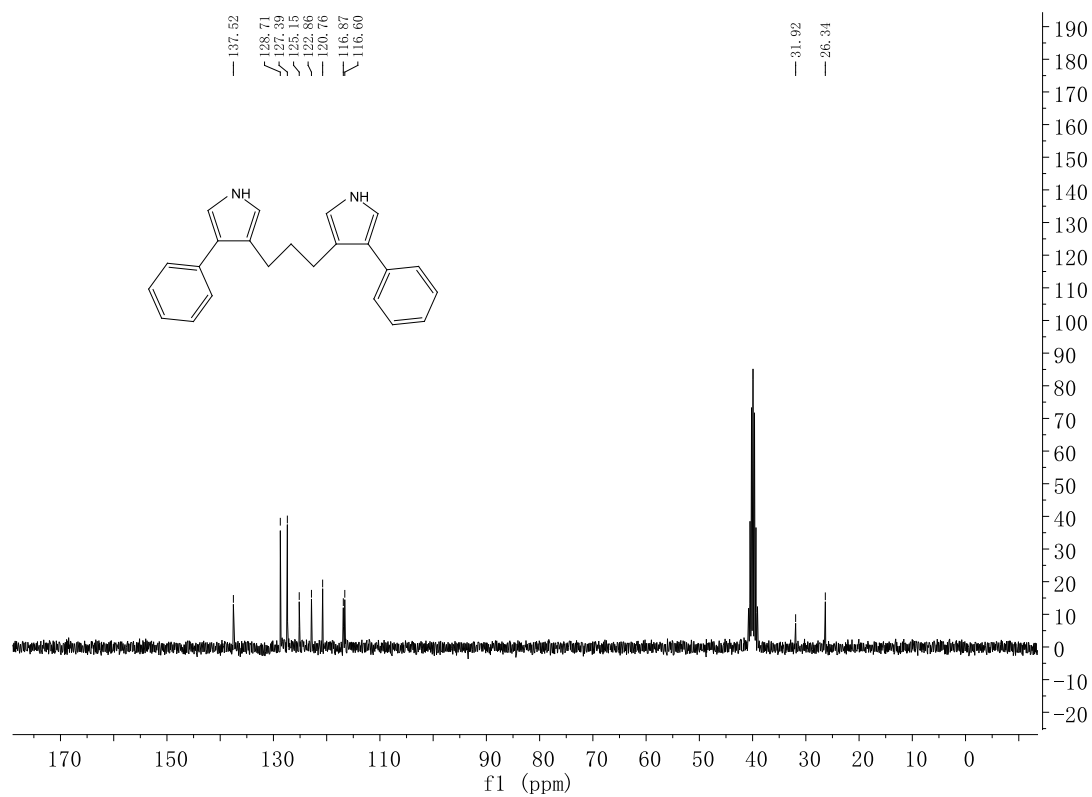

Electronic Supplementary Material (ESI) for *Organic & Biomolecular Chemistry*  
This journal is © The Royal Society of Chemistry 2013

**bis((4-phenyl-1H-pyrrol-3-yl)methyl)sulfane (3q).**

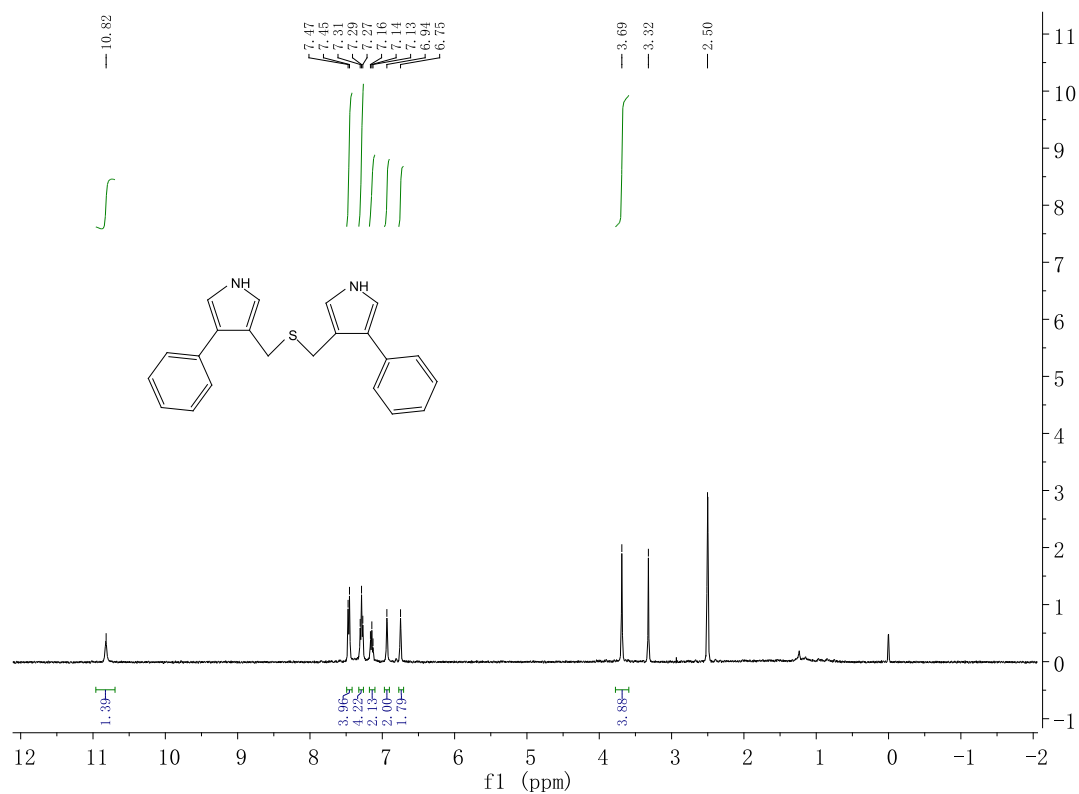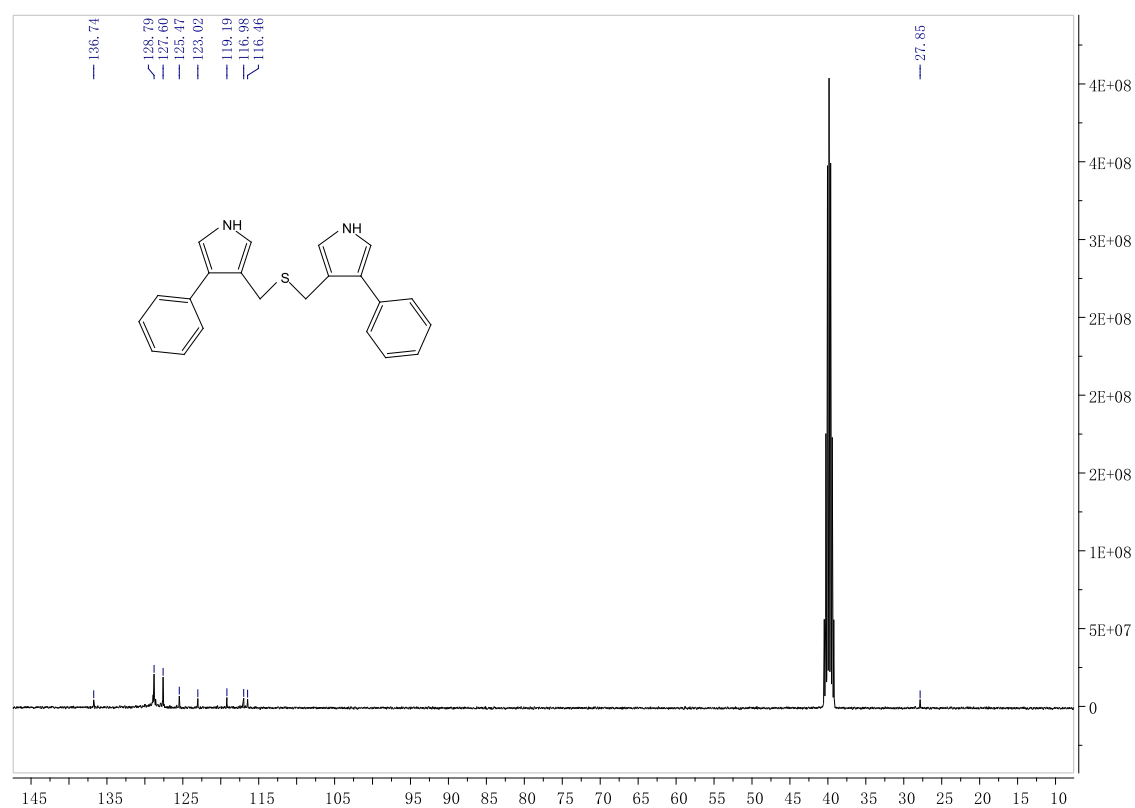

Electronic Supplementary Material (ESI) for *Organic & Biomolecular Chemistry*  
This journal is © The Royal Society of Chemistry 2013

**N-methyl-1-(4-phenyl-1H-pyrrol-3-yl)-N-((4-phenyl-1H-pyrrol-3-yl)methyl)methanamine (3r).**

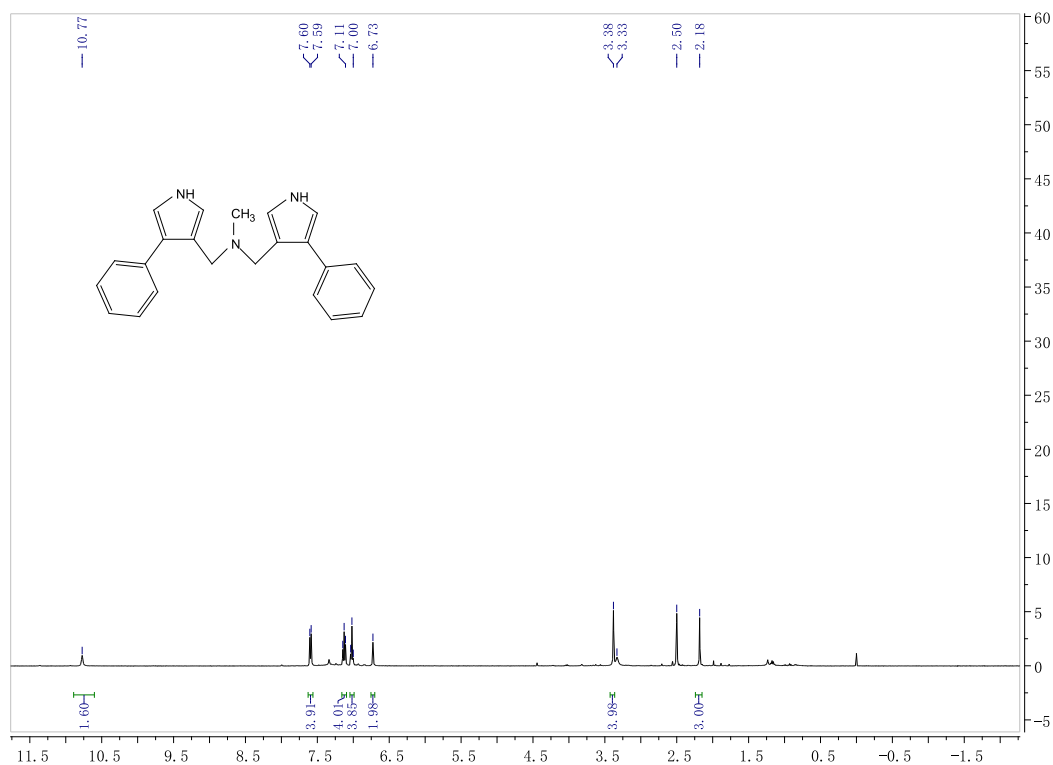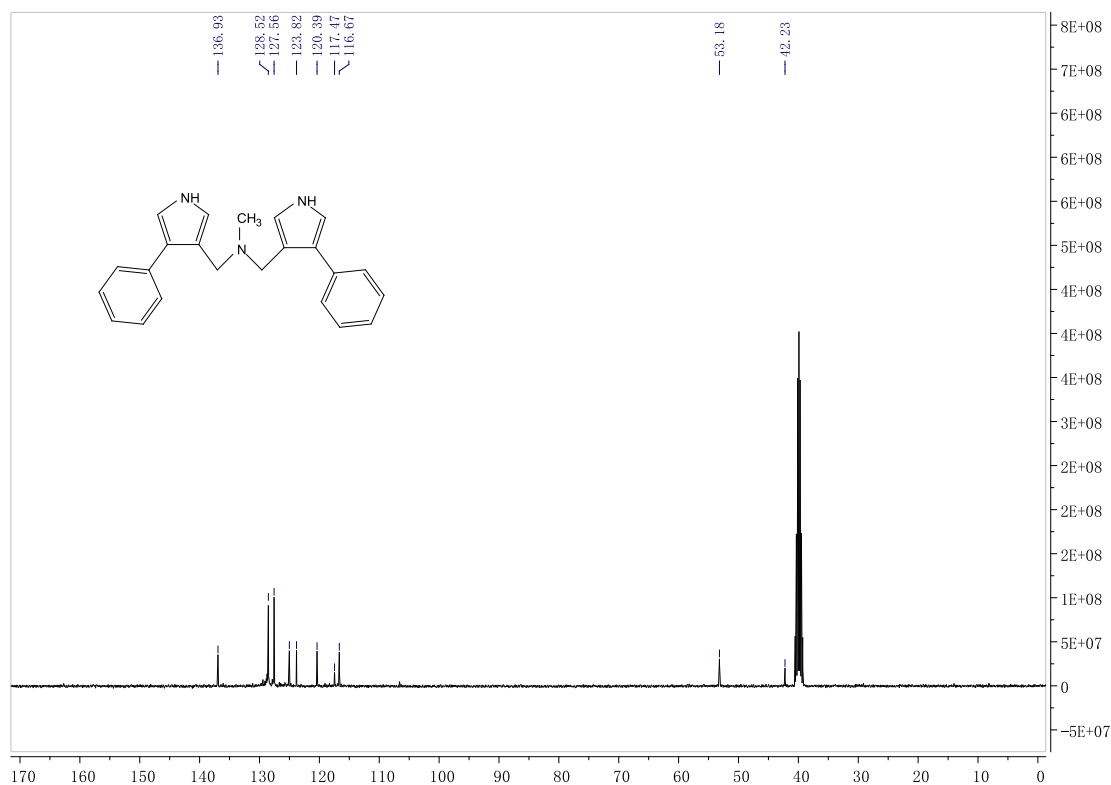

Electronic Supplementary Material (ESI) for *Organic & Biomolecular Chemistry*  
This journal is © The Royal Society of Chemistry 2013

**bis(4-phenyl-1H-pyrrol-3-yl)methanone (3s).**

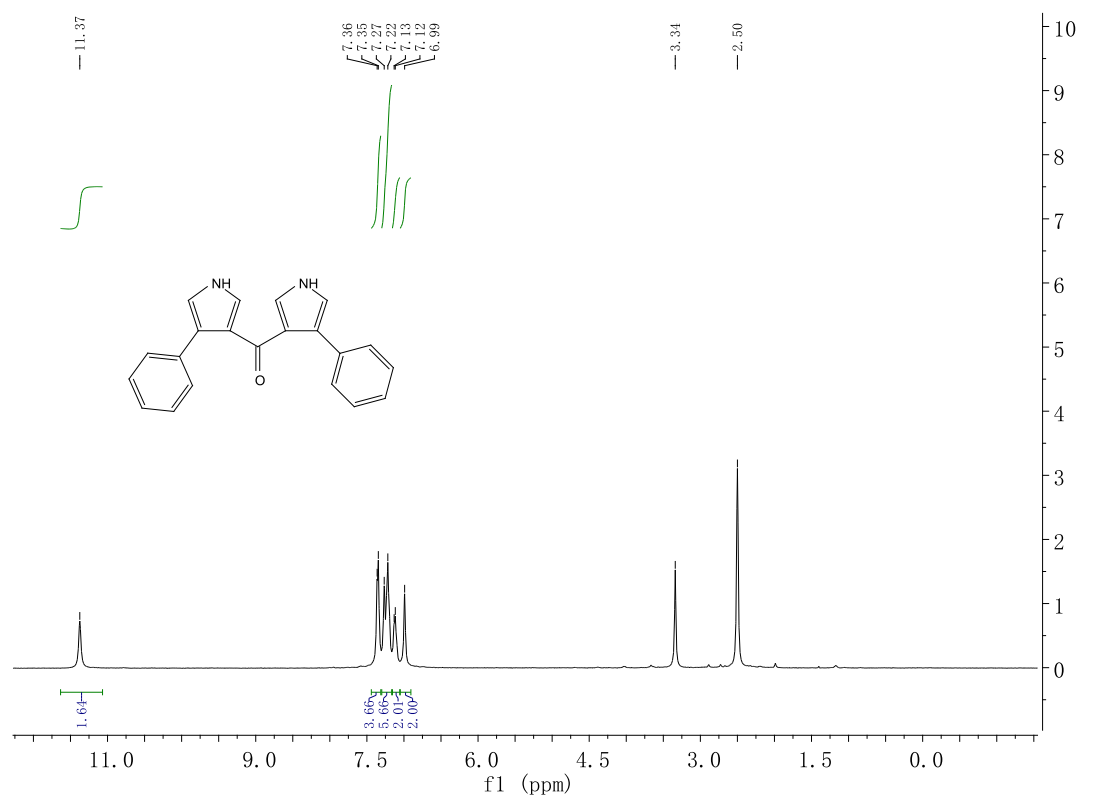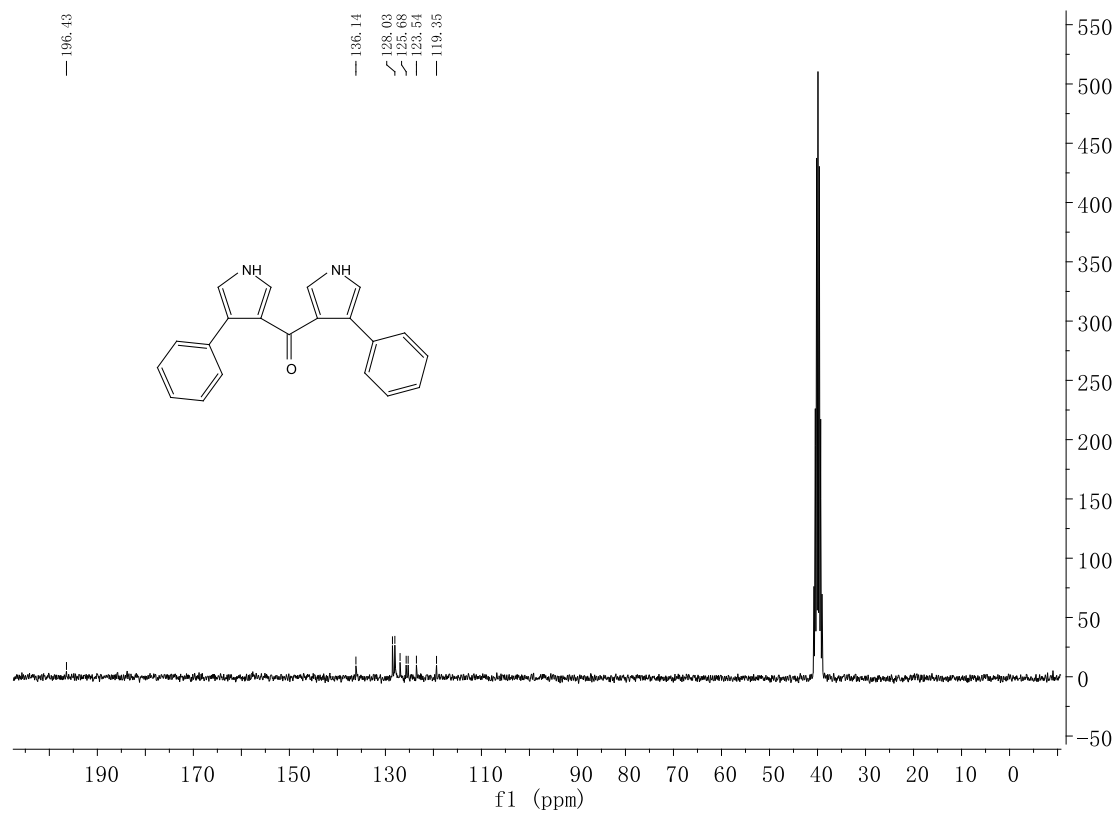

Electronic Supplementary Material (ESI) for *Organic & Biomolecular Chemistry*  
This journal is © The Royal Society of Chemistry 2013

**2-((4-phenyl-1H-pyrrol-3-yl)methyl)benzoic acid (3t).**

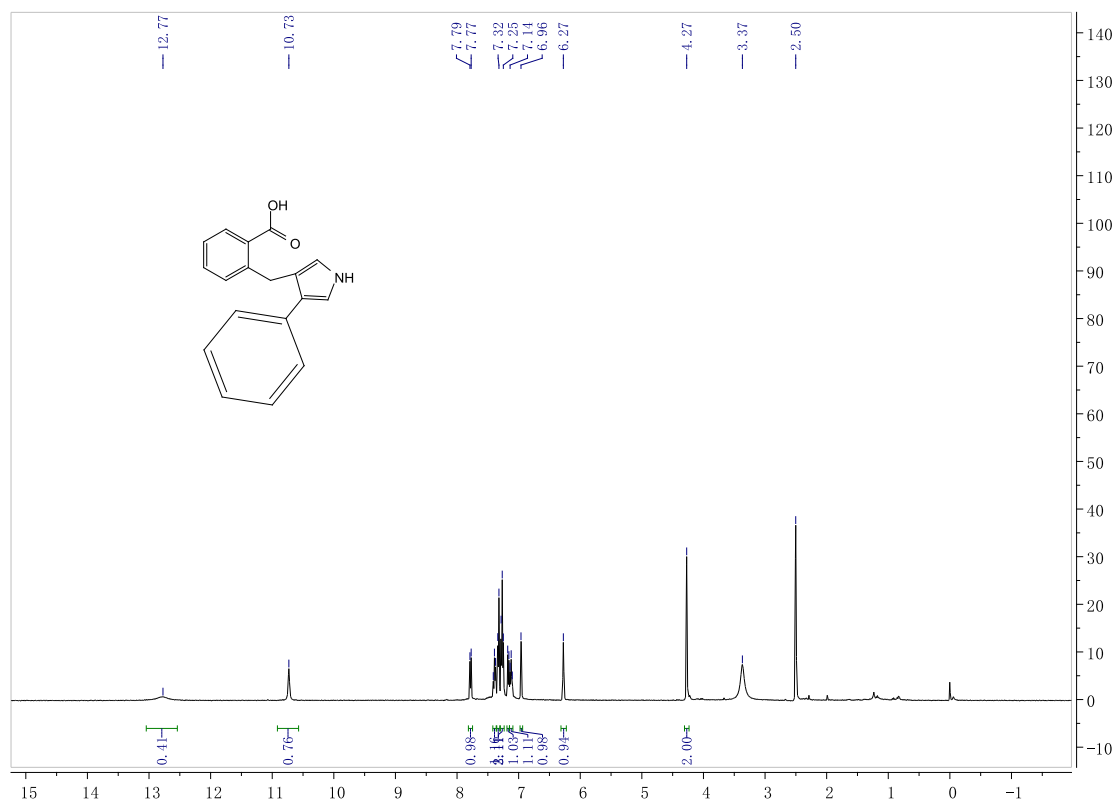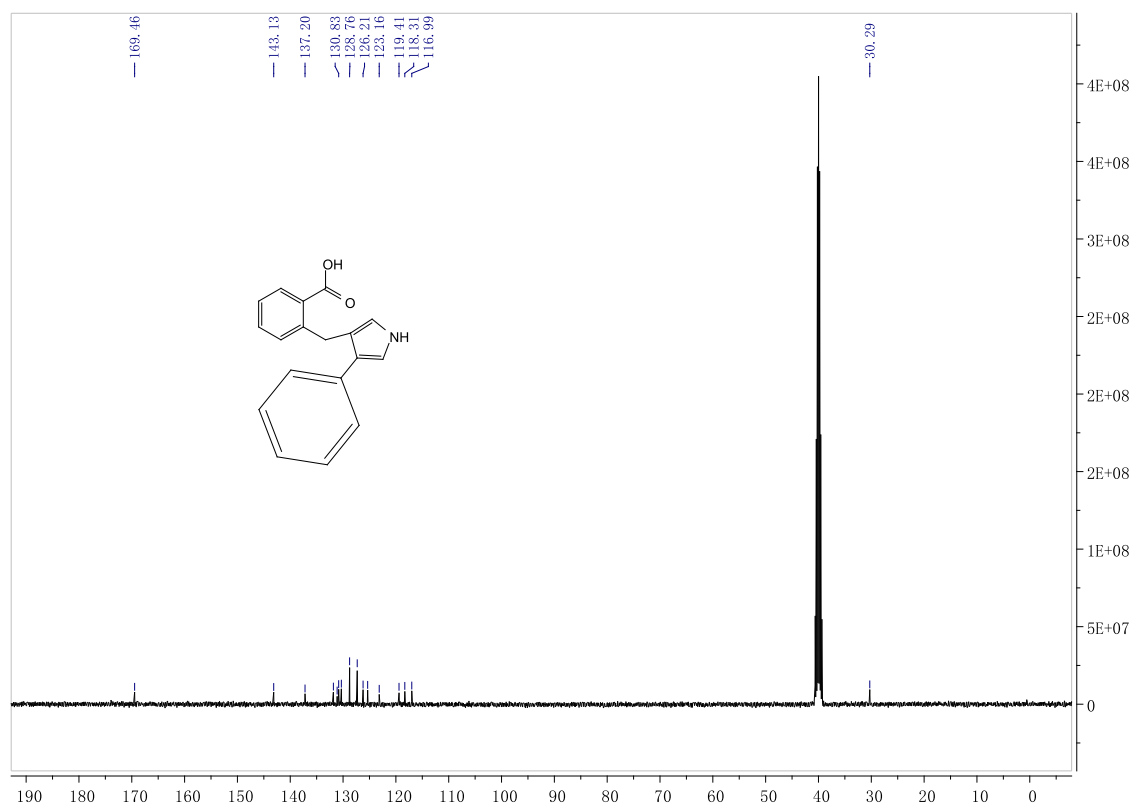

Electronic Supplementary Material (ESI) for *Organic & Biomolecular Chemistry*  
This journal is © The Royal Society of Chemistry 2013

**Intermediate (D).**

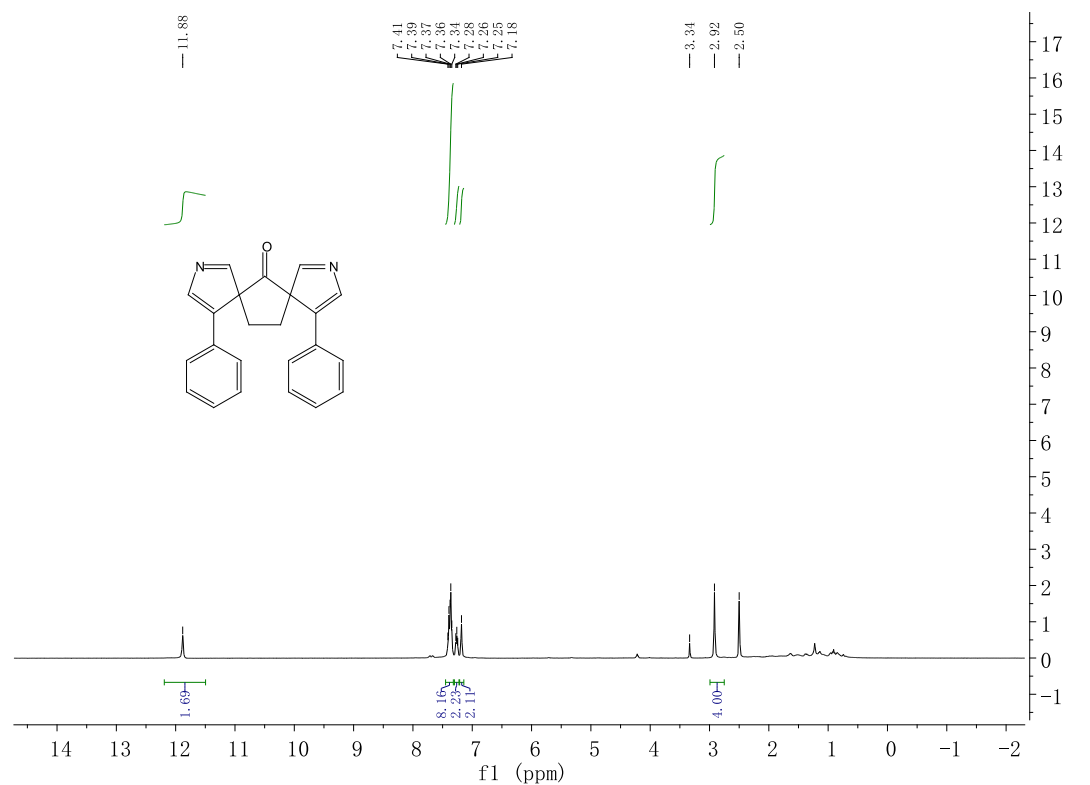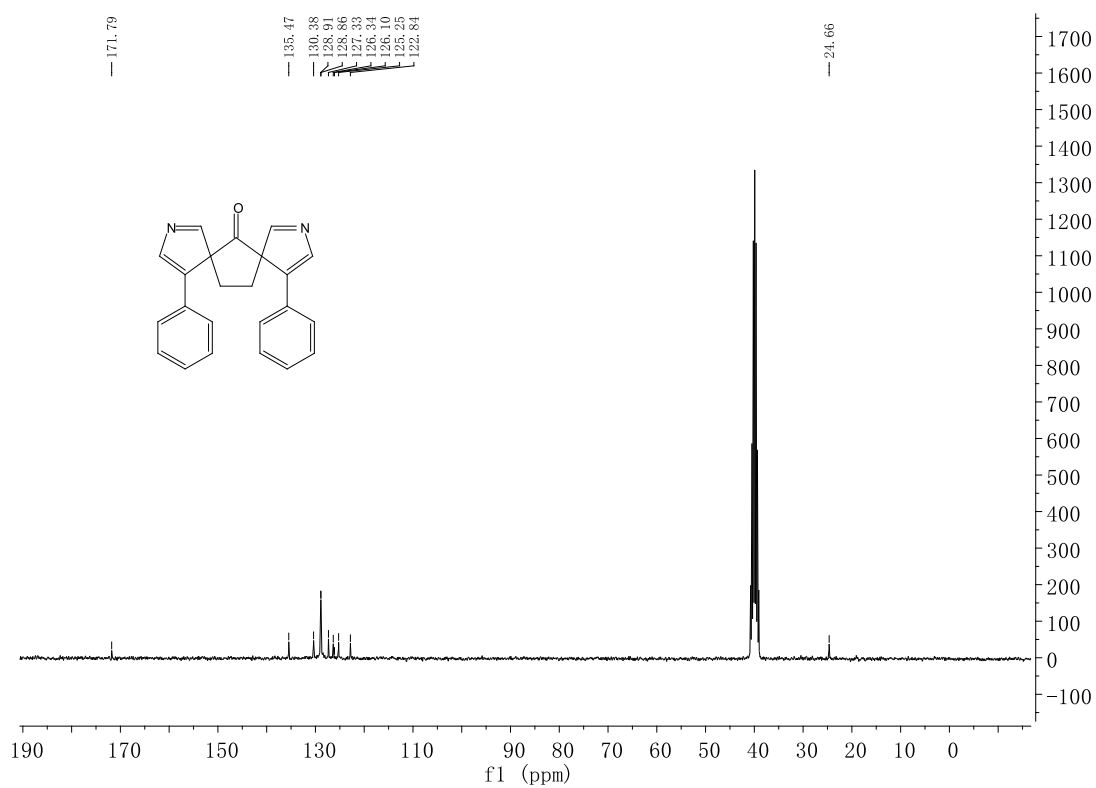

Supplement: c3ob42570c.pdf [file c3ob42570c.pdf]
